# Supplementary material for: Thermal cleavage of hydrogen bond-induced LCST-type phase separation of PHEMA and related poly(hydroxyalkyl (meth)acrylate)s in mixed organic solvents
Source: Royal Society of Chemistry journal article supplement (doi:10.1039/d4py00250d), 2024-01-01
Supplement: d4py00250d1.pdf [file d4py00250d1.pdf]

Supporting information

## **Thermal Cleavage of Hydrogen Bonds-Induced LCST-type Phase Separation of PHEMA and Related Poly(hydroxyalkyl (meth)acrylate)s in Mixed Organic Solvents**

Natsuki Inaba<sup>1†</sup>, Koki Takasu<sup>2†</sup>, Keitaro Matsuoka<sup>1,2,3\*</sup>, and Kazuki Sada<sup>1,2,3\*</sup>

<sup>1</sup> Graduate School of Chemical Sciences and Engineering, Hokkaido University, Sapporo 060-0810, Japan.

<sup>2</sup> Department of Chemistry, Graduate School of Science, Hokkaido University, Sapporo 060-0810, Japan.

<sup>3</sup> Department of Chemistry, Faculty of Science, Hokkaido University, Sapporo 060-0810, Japan.

Phone: +81-11-706-3473 / Fax: +081-11-706-3474

E-mail: sadatcm@sci.hokudai.ac.jp, ma2oka@sci.hokudai.ac.jp

†These authors equally contributed.

Contents.

|                                                                                                                  |    |
|------------------------------------------------------------------------------------------------------------------|----|
| 1. General information .....                                                                                     | 2  |
| 2. Polymerization procedures and characterization of poly(hydroxyalkyl (meth)acrylate)s .....                    | 3  |
| 3. Solubility and Thermo-responsiveness of PHEMA .....                                                           | 13 |
| 4. Temperature-dependent particle size change of PHEMA .....                                                     | 17 |
| 5. Polymer concentration dependence on Thermo-responsiveness of poly(hydroxyalkyl (meth)acrylate)s .....         | 18 |
| 6. The effect of molecular weight on the thermo-responsiveness of PHEMA .....                                    | 19 |
| 6-1. Preparation of lower molecular weight of Poly(2-hydroxyethyl methacrylate) (sPHEMA) .....                   | 19 |
| 6-2. Thermo-responsiveness of sPHEMA .....                                                                       | 20 |
| 6-3. Comparison of PHEMA and sPHEMA on their thermo-responsiveness .....                                         | 21 |
| 7. Solubility and Thermo-responsiveness of poly(hydroxyalkyl (meth)acrylate)s .....                              | 23 |
| 7-1. Summary of solubility of poly(hydroxyalkyl (meth)acrylate)s in a series of primary aliphatic alcohols ..... | 23 |
| 7-2. Thermo-responsiveness of P3MA .....                                                                         | 24 |
| 7-3. Thermo-responsiveness of P4MA .....                                                                         | 26 |
| 7-4. Thermo-responsiveness of P5MA .....                                                                         | 28 |
| 7-5. Thermo-responsiveness of P3A .....                                                                          | 31 |
| 7-6. Thermo-responsiveness of P4A .....                                                                          | 33 |
| 8. Thermal properties of poly(hydroxyalkyl (meth)acrylate)s analyzed by DSC .....                                | 35 |
| 9. Supplementary references .....                                                                                | 37 |

## 1. General information

Poly(2-hydroxyethyl methacrylate) (PHEMA) (average  $M_v$ : 20,000) was purchased from Sigma-Aldrich ([529265](#)). All polymerization reactions were carried out in sealed vessels degassing under reduced pressure unless otherwise noted. Commercially available dimethylacetamide (DMAc), (Wako Ltd., Super Dehydrated grade) was used without further manipulation as a reaction media for polymerization reactions. Commercially available 4-hydroxypropyl acrylate stabilized with 4-methoxyphenol was purified by silicagel column chromatography before use. 3-hydroxypropyl methacrylate, 4-hydroxybutyl methacrylate, 5-hydroxypentyl methacrylate, and 3-hydroxypropyl acrylate were prepared by the condensation reaction of the corresponding diol and methacrylic anhydride or acryloyl chloride. The NMR spectrum is consistent with the literature<sup>[1,2]</sup>. All other reagents were commercially available and used as received unless otherwise noted.

<sup>1</sup>H NMR spectra were recorded on JEOL JNM-ECZ400 spectrometers. Chemical shifts were reported in the scale relative to (CH<sub>3</sub>)<sub>2</sub>SO (2.50 ppm) and (CH<sub>3</sub>)<sub>4</sub>Si (0.00 ppm) as an internal reference, respectively.

Size exclusion chromatography (SEC) Measurements were performed on a polystyrene gel column Shodex K-803L and K-805L connected to a SHIMADZU CTO-20A with LC-20AD gradient pump, SPD-20A UV detector, and RID-20A refractive detector. DMF was used as an eluent at 40 °C (flow rate of 1.0 mL/min). The calibrations were made against linear poly(ethylene oxide) standards. Number average molecular weight ( $M_n$ ), weight average molecular weight ( $M_w$ ), and polydispersity index (PDI) were determined by SEC Measurements.

Solubility test of poly(hydroxyalkyl (meth)acrylate)s in the mixtures of various hydrogen-bonding solvents and non-polar solvents was done by mixing the suitable amount of the solvent mixtures and poly(hydroxyalkyl (meth)acrylate)s at low temperature (0 °C), room temperature (ca. 25 °C) and elevated temperature (ca. 100 °C).

Transmittance Measurements at 800 nm were recorded on a Jasco V-750 spectrophotometer with a Jasco ETC-505T temperature controller, and the temperature scan rate was 1.5 °C/min. Cloud point ( $T_c$ ) was determined by the Transmittance measurement using UV-vis as the temperature at which %Transmittance = 90 in the heating process for LCST-type phase separation or in the cooling process for LCST-type phase separation, respectively. Dynamic light scattering (DLS) data were collected on a Malvern Nano-S light scattering system with a 633 nm He/Ne laser at 20 °C.

Differential scanning calorimetry (DSC) was performed on a METTLER TOLEDO STAR<sup>e</sup> System DSC 1 at a heating rate of 10 °C/min under a nitrogen flow of 60 mL/min.

## 2. Polymerization procedures and characterization of poly(hydroxyalkyl (meth)acrylate)s

### Poly(3-hydroxypropyl methacrylate) (P3MA)

A solution of 3-hydroxypropyl methacrylate (3.12 g, 21.6 mmol), AIBN (6.82 mg, 0.04 mmol), 4-Cyano-4-[(dodecylsulfanylthiocarbonyl)sulfanyl]pentanoic Acid (84.1 mg, 0.21 mmol) in DMAc (5 mL) was prepared in an ampule. The ampule was degassed with three freeze-evacuate-thaw cycles and sealed. The reaction mixture was stirred at 80 °C for 24 h. After the ampule was cooled, the mixture was diluted with MeOH and reprecipitated with diethyl ether. Filtration and drying in vaquo afforded **P3MA** (3.12 g, 100% yield) as a yellow solid.

$^1\text{H NMR}$  (DMSO- $d_6$ , 400 MHz)  $\delta$  = 4.45-4.66 (m, 1H), 3.85-4.08 (m, 2H), 3.42-3.62 (m, 2H), 1.56-2.03 (m, 4H), 0.53-1.06 (m, 3H).

SEC (DMF):  $M_n = 8.21 \times 10^3$ , PDI = 1.11.

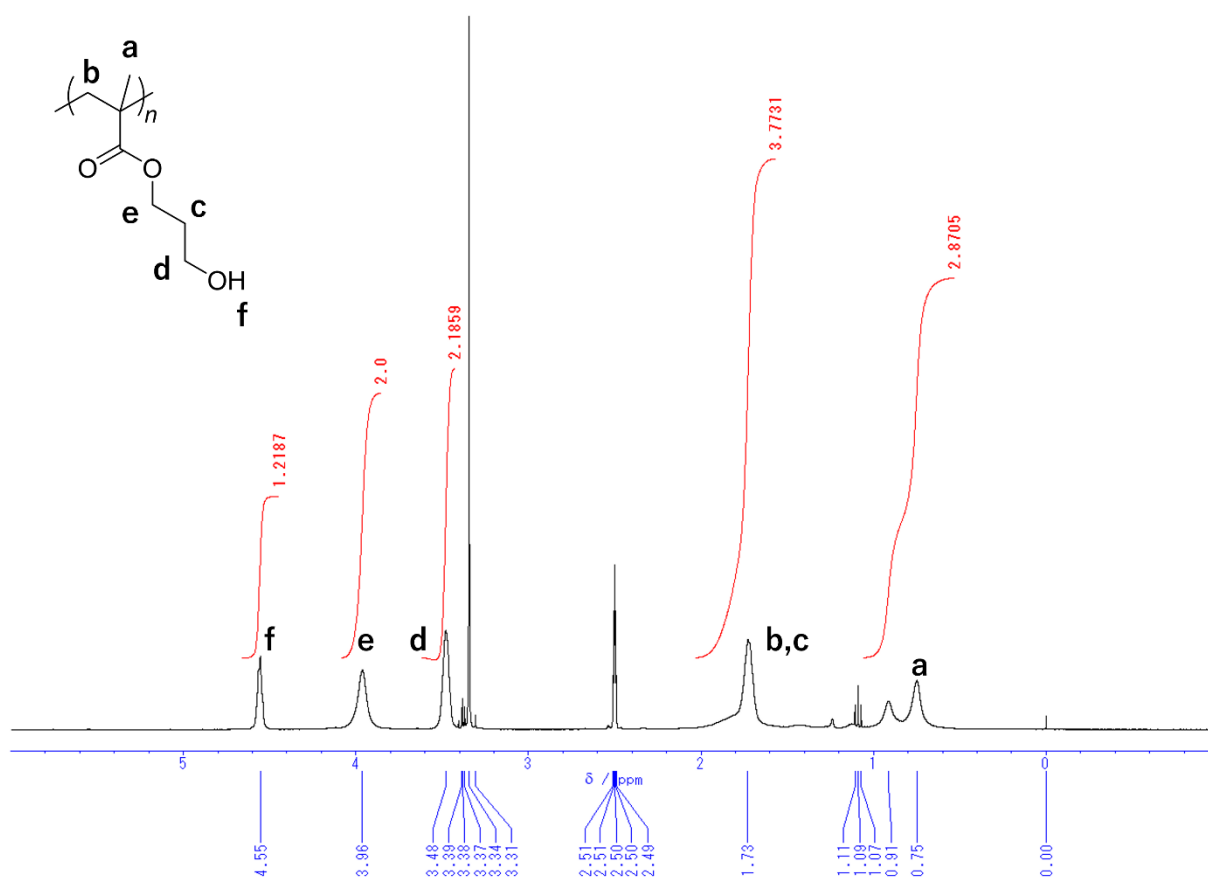

**Figure S1a.**  $^1\text{H NMR}$  spectrum of **P3MA**

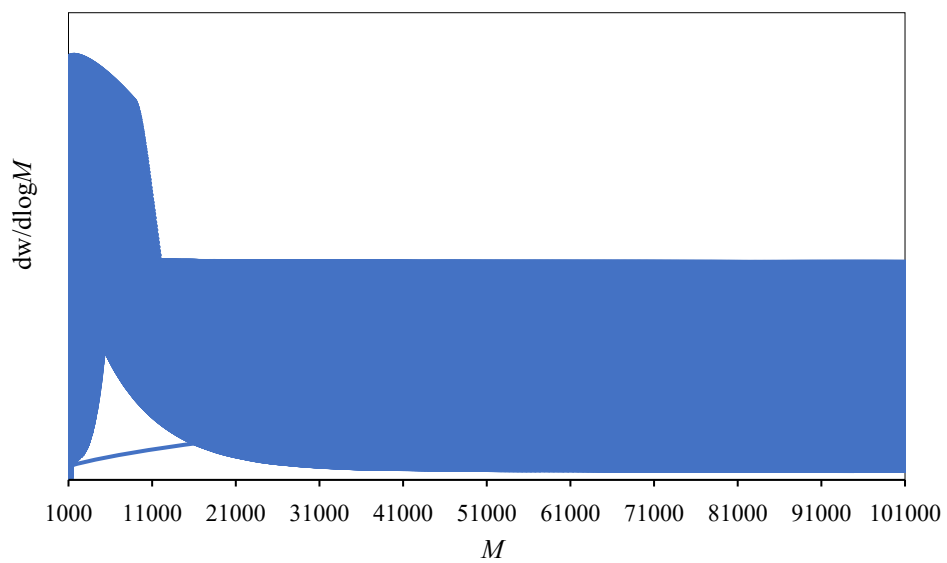

**Figure S1b.** SEC chromatogram of **P3MA**. The depressed peak with a molecular weight close to 1000 originates from residual solvent.

### Poly(4-hydroxybutyl methacrylate) (P4MA)

A solution of 4-hydroxybutyl methacrylate (3.04 g, 19.2 mmol), AIBN (3.27 mg, 0.02 mmol), 4-Cyano-4-[(dodecylsulfanylthiocarbonyl)sulfanyl]pentanoic Acid (76.4 mg, 0.19 mmol) in DMAc (6 mL) was prepared in an ampule. The ampule was degassed with three freeze-evacuate-thaw cycles and sealed. The reaction mixture was stirred at 80 °C for 24 h. After the ampule was cooled, the mixture was diluted with MeOH and reprecipitated with diethyl ether. Filtration and drying in vacuo afforded **P4MA** (2.86 g, 94% yield) as a solid.  $^1\text{H}$  NMR (DMSO- $d_6$ , 400 MHz)  $\delta$  = 4.41-4.56 (m, 1H), 3.76-4.02 (m, 2H), 3.37-3.49 (m, 2H), 1.35-1.93 (m, 6H), 0.50-1.05 (m, 3H).

SEC (DMF):  $M_n$  =  $8.76 \times 10^3$ , PDI = 1.14.

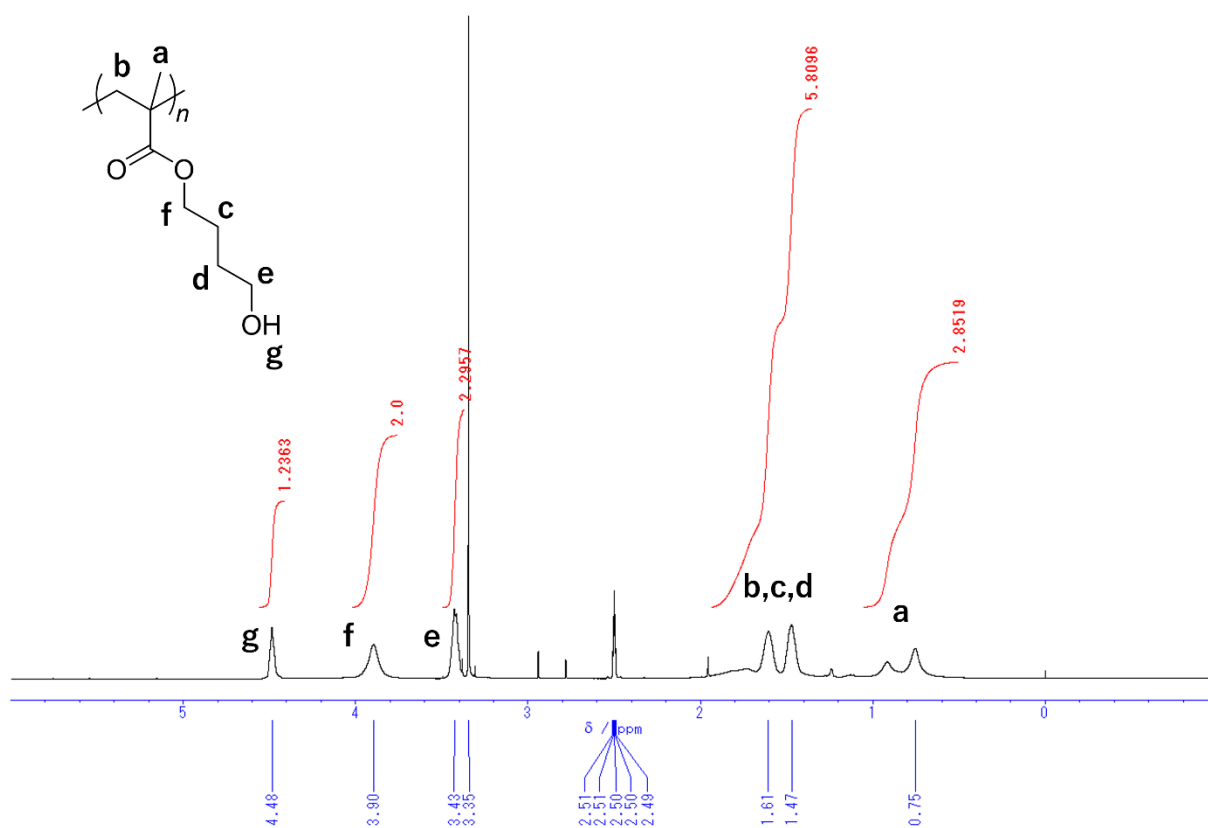

**Figure S2a.**  $^1\text{H}$ NMR spectrum of **P4MA**

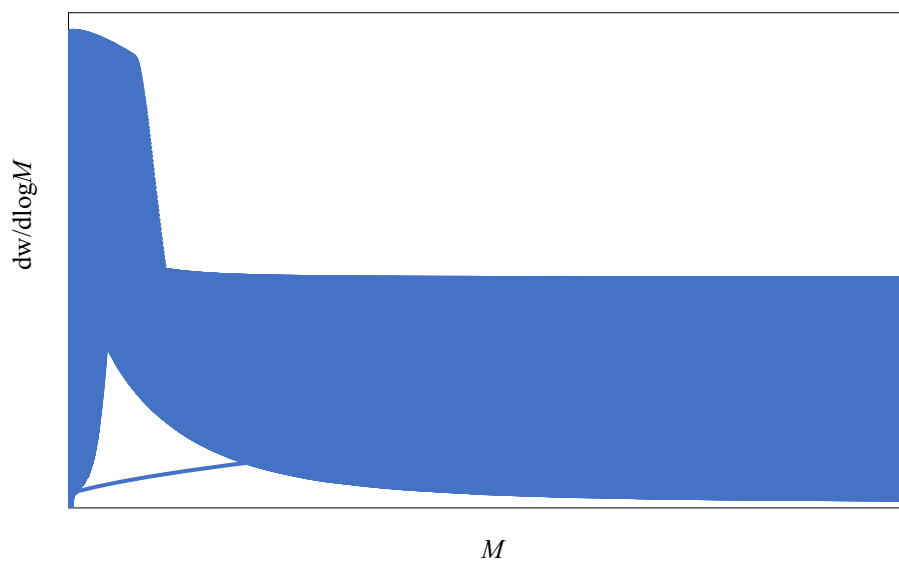

**Figure S2b.** SEC chromatogram of **P4MA**. The depressed peak with a molecular weight close to 1000 originates from residual solvent.

### Poly(5-hydroxypentyl methacrylate) (P5MA)

A solution of 5-hydroxypentyl methacrylate (4.13 g, 24.0 mmol), AIBN (4.33 mg, 0.026 mmol), 4-Cyano-4-[(dodecylsulfanylthiocarbonyl)sulfanyl]pentanoic Acid (94.5 mg, 0.23 mmol) in DMAc (4.5 mL) was prepared in an ampule. The ampule was degassed with three freeze-evacuate-thaw cycles and sealed. The reaction mixture was stirred at 80 °C for 24 h. After the ampule was cooled, the mixture was diluted with MeOH and reprecipitated with diethyl ether. Filtration and drying in vacuo afforded **P5MA** (3.85 g, 93% yield) as a yellow solid.

$^1\text{H NMR}$  ( $\text{DMSO-}d_6$ , 400 MHz)  $\delta$  = 4.36-4.48 (m, 1H), 3.76-4.03 (m, 2H), 3.40-3.48 (m, 2H), 1.21-2.09 (m, 8H), 0.50-1.05 (m, 3H).

SEC (DMF):  $M_n = 1.03 \times 10^4$ , PDI = 1.35.

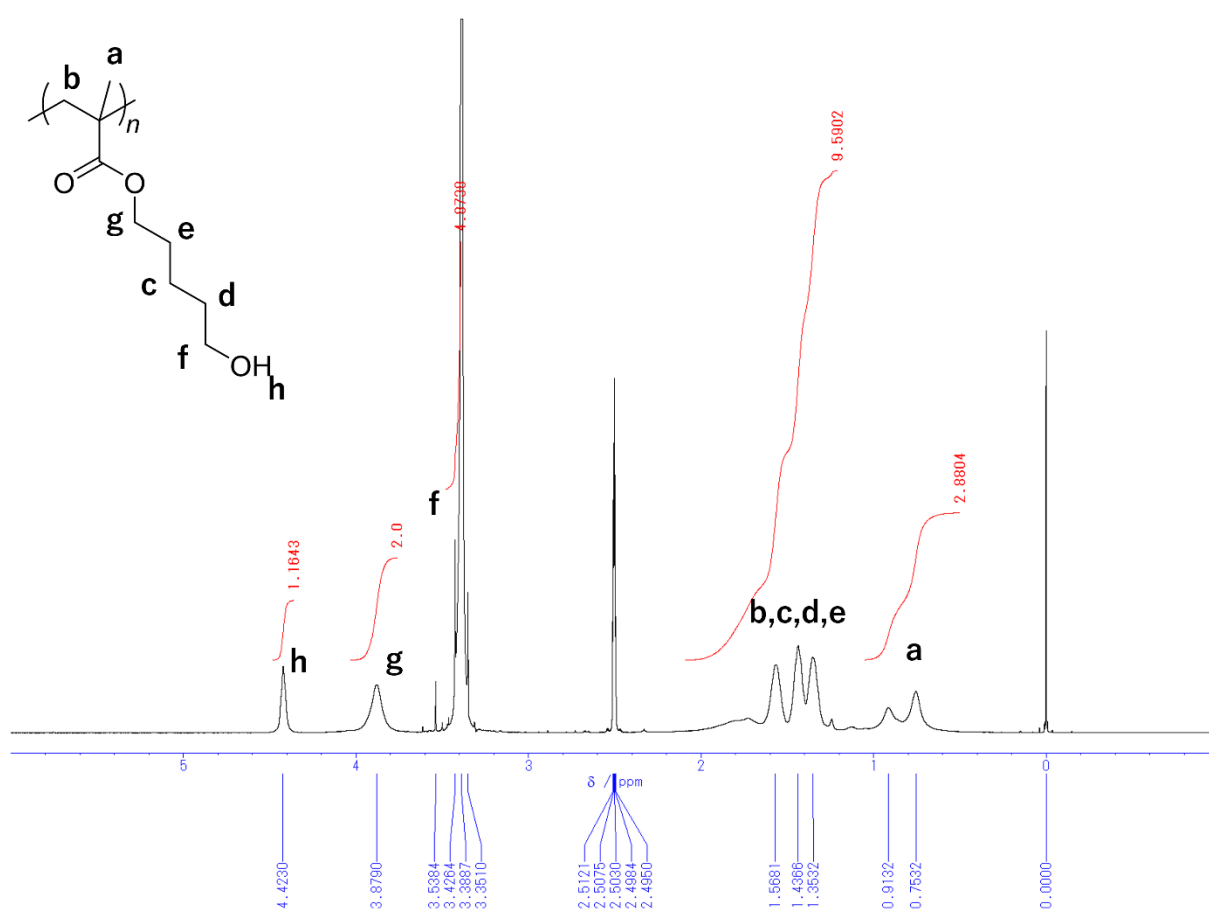

**Figure S3a.**  $^1\text{H NMR}$  spectrum of **P5MA**

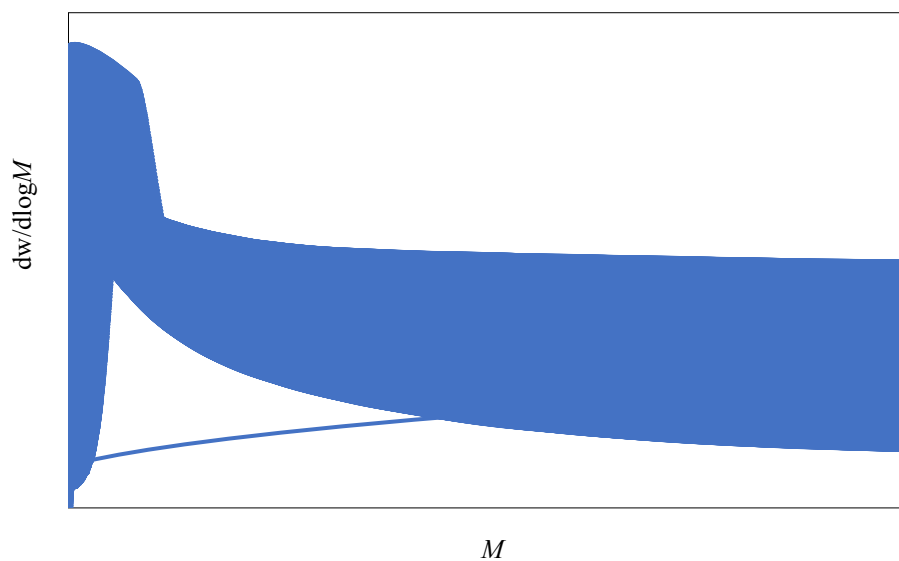

**Figure S3b.** SEC chromatogram of **P5MA**. The depressed peak with a molecular weight close to 1000 originates from residual solvent.



### Poly(3-hydroxypropyl acrylate) (P3A)

A solution of 3-hydroxypropyl acrylate (3.08 g, 23.6 mmol), AIBN (3.80 mg, 0.023 mmol), 2-(Dodecylthiocarbonothioylthio)-2-methylpropionic Acid (79.9 mg, 0.22 mmol) in DMAc (3 mL) was prepared in an ampule. The ampule was degassed with three freeze-evacuate-thaw cycles and sealed. The reaction mixture was stirred at 80 °C for 24 h. After the ampule was cooled, the mixture was diluted with MeOH and reprecipitated with diethyl ether. Filtration and drying in *vaquo* afforded **P3A** (2.83 g, 92% yield) as a solid.

$^1\text{H NMR}$  (DMSO- $d_6$ , 400 MHz)  $\delta$  = 4.46-4.64 (m, 1H), 3.88-4.20 (m, 2H), 3.42-3.52 (m, 2H), 2.02-2.39 (m, 1H), 1.18-1.92 (m, 4H).

SEC (DMF):  $M_n$  =  $8.67 \times 10^3$ , PDI = 1.04.

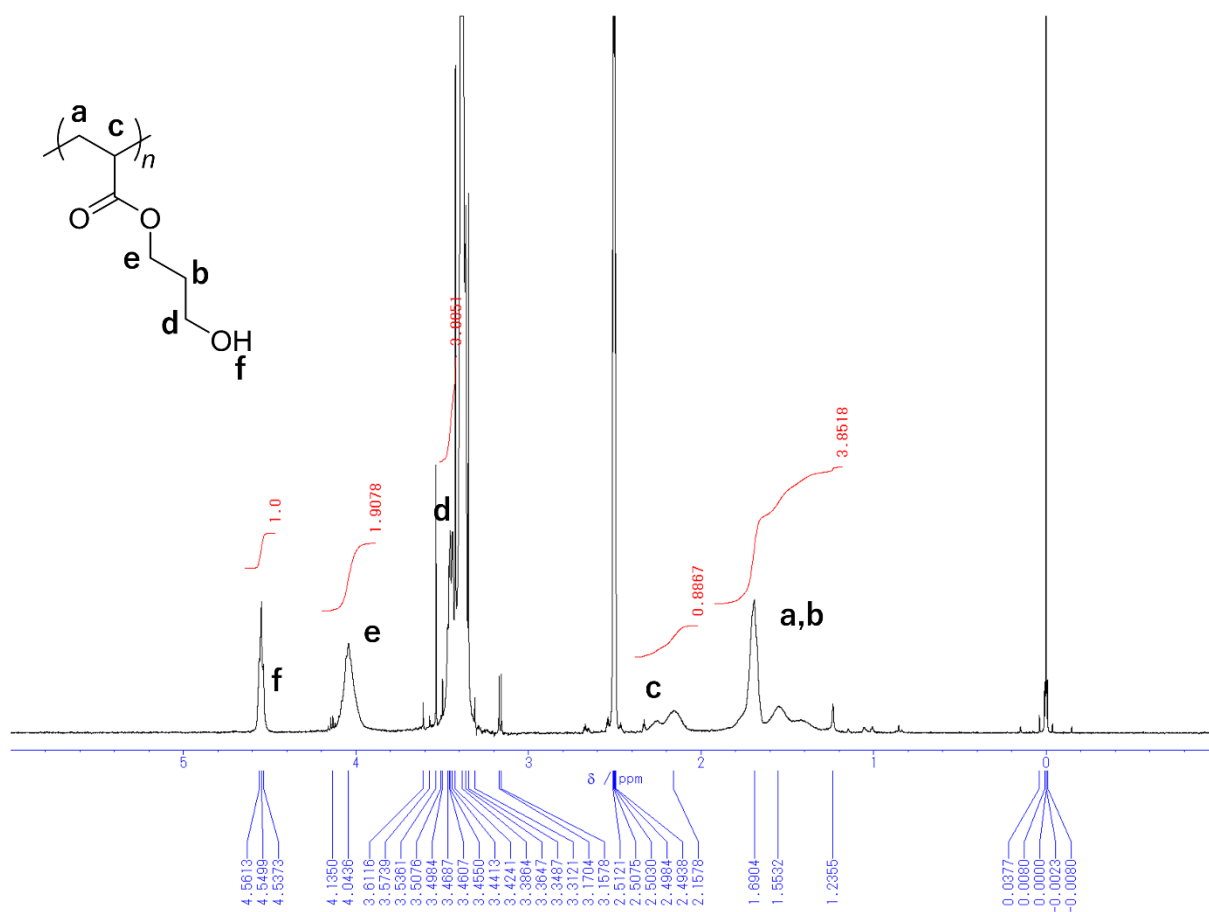

**Figure S4a.**  $^1\text{H NMR}$  spectrum of **P3A**

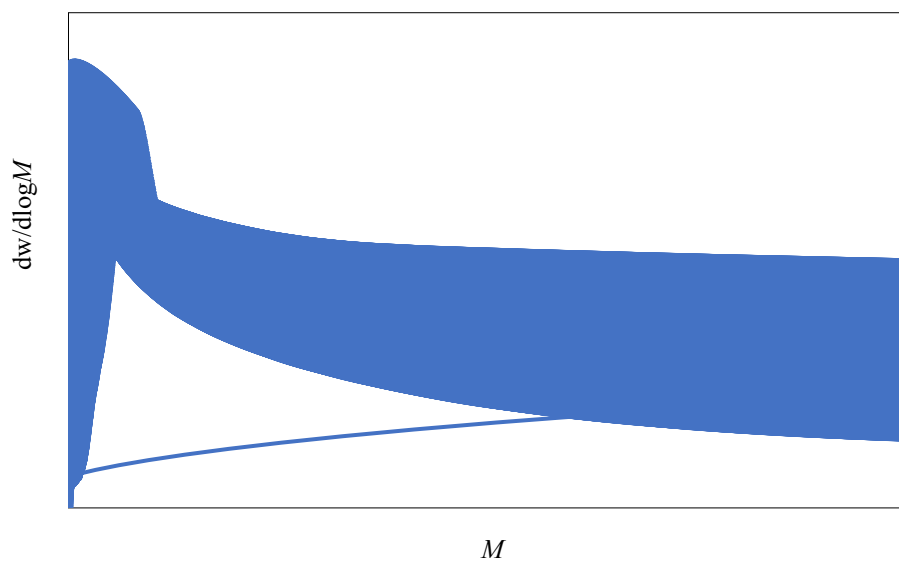

**Figure S4b.** SEC chromatogram of **P3A**. The depressed peak with a molecular weight close to 1000 originates from residual solvent.

### Poly(4-hydroxybutyl acrylate) (P4A)

A solution of 4-hydroxybutyl acrylate (5.20 g, 36.1 mmol), AIBN (10.9 mg, 0.067 mmol), 2-(Dodecylthiocarbonothioylthio)-2-methylpropionic Acid (130 mg, 0.34 mmol) in DMAc (5 mL) was prepared in an ampule. The ampule was degassed with three freeze-evacuate-thaw cycles and sealed. The reaction mixture was stirred at 80 °C for 24 h. After the ampule was cooled, the mixture was diluted with MeOH and reprecipitated with diethyl ether. Filtration and drying in vacuo afforded **P4A** (4.66 g, 90% yield) as a yellow solid.

$^1\text{H NMR}$  (DMSO- $d_6$ , 400 MHz)  $\delta$  = 4.34-4.51 (m, 1H), 3.81-4.08 (m, 2H), 3.37-3.46 (m, 2H), 2.01-2.40 (m, 1H), 1.29-1.87 (m, 6H).

SEC (DMF):  $M_n = 7.05 \times 10^3$ , PDI = 1.25.

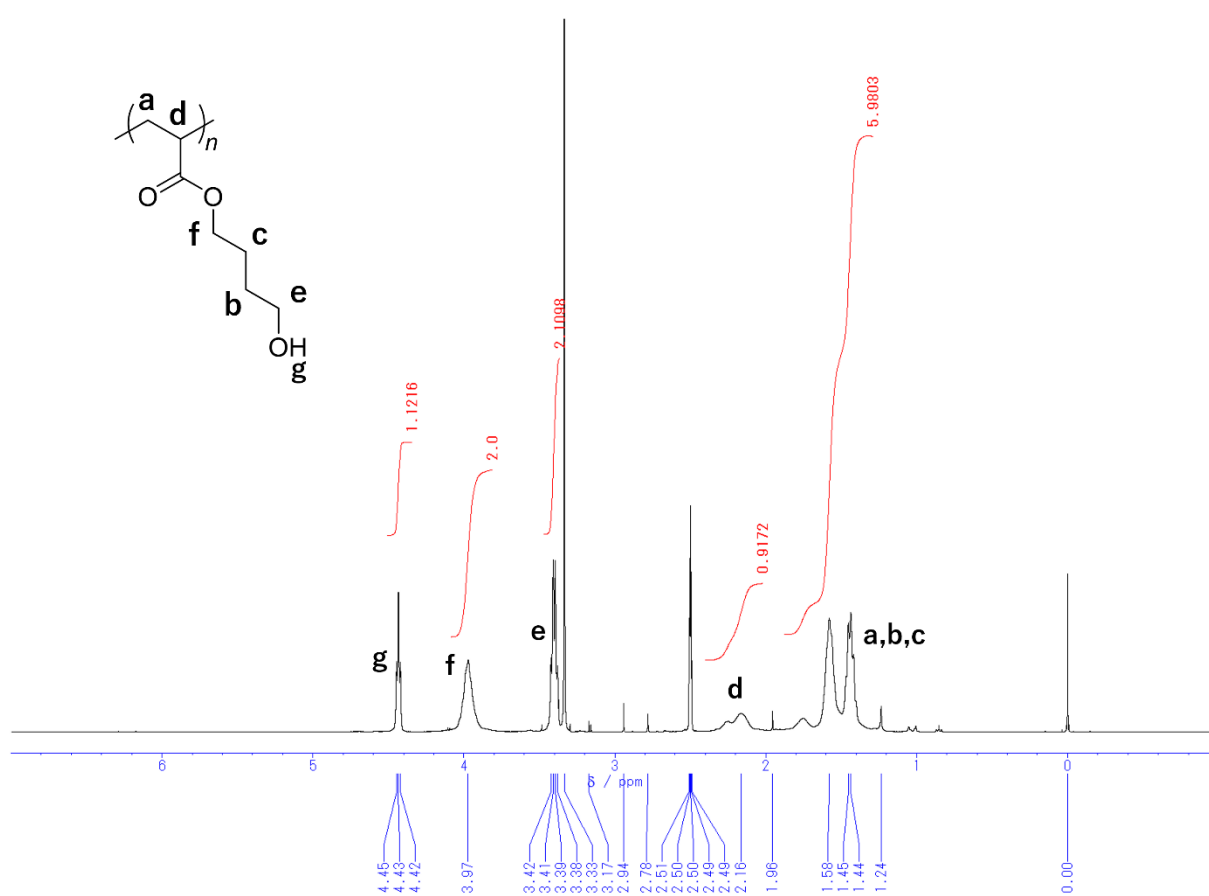

**Figure S5a.**  $^1\text{H NMR}$  spectrum of **P4A**

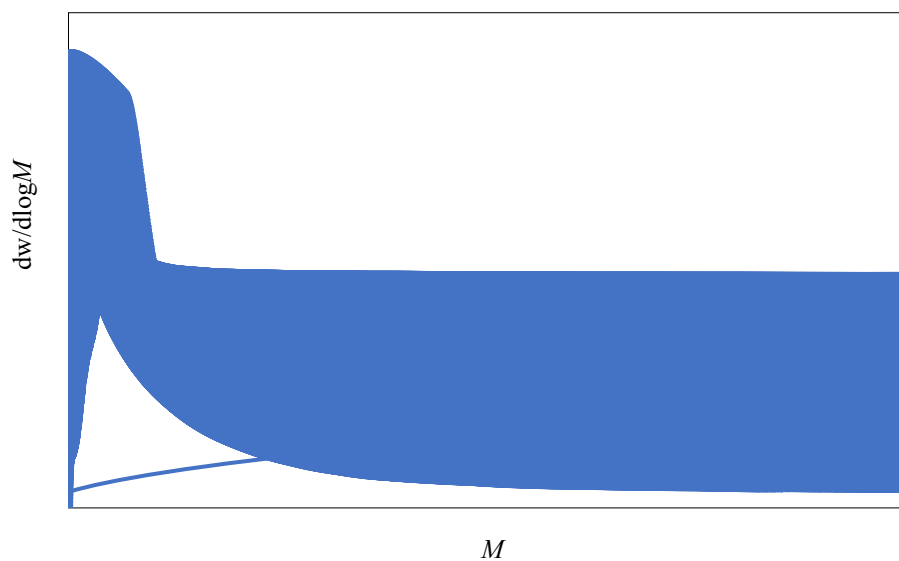

**Figure S5b.** SEC chromatogram of **P4A**. The depressed peak with a molecular weight close to 1000 originates from residual solvent.

### 3. Solubility and Thermo-responsiveness of PHEMA

S: soluble, I: insoluble, P: partially soluble, F: freeze of solvent, cool: ca. 0°C, heat: ca. 100°C

**Table S1.** Solubility of PHEMA

| polymer | solvent       | volume      | solubility |      |      |
|---------|---------------|-------------|------------|------|------|
|         |               |             | cool       | r.t. | heat |
| 2.15 mg | DMSO          | 85 $\mu$ L  | F          | S    | S    |
| 3.31 mg | acetonitrile  | 130 $\mu$ L | I          | I    | I    |
| 2.26 mg | DMF           | 90 $\mu$ L  | S          | S    | S    |
| 4.22 mg | methanol      | 170 $\mu$ L | S          | S    | S    |
| 2.62 mg | ethanol       | 105 $\mu$ L | S          | S    | S    |
| 2.27 mg | 1-propanol    | 90 $\mu$ L  | I          | S    | S    |
| 2.38 mg | 2-butanone    | 95 $\mu$ L  | I          | I    | I    |
| 2.10 mg | 1-octanol     | 100 $\mu$ L | I          | I    | I    |
| 2.55 mg | THF           | 100 $\mu$ L | I          | I    | I    |
| 2.49 mg | acetic acid   | 100 $\mu$ L | S          | S    | S    |
| 2.78 mg | ethyl acetate | 110 $\mu$ L | I          | I    | I    |
| 2.42 mg | 1,4-dioxane   | 100 $\mu$ L | I          | I    | S    |
| 2.34 mg | toluene       | 95 $\mu$ L  | I          | I    | I    |
| 2.47 mg | DCE           | 100 $\mu$ L | I          | I    | I    |
| 2.48 mg | cyclohexane   | 100 $\mu$ L | F          | I    | I    |

**Table S2.** Thermo-responsiveness of **PHEMA** in pure solvent

| polymer | solvent             | volume      | solubility |    |      | Thermo-responsiveness |
|---------|---------------------|-------------|------------|----|------|-----------------------|
|         |                     |             | cool       | rt | heat |                       |
| 2.30 mg | 1-butanol           | 92 $\mu$ L  | I          | I  | S    | UCST                  |
| 2.50 mg |                     | 250 $\mu$ L | I          | I  | S    | UCST                  |
| 2.23 mg |                     | 446 $\mu$ L | I          | I  | S    | UCST                  |
| 2.39 mg | 2-butanol           | 96 $\mu$ L  | I          | S  | S    | UCST                  |
| 3.02 mg |                     | 302 $\mu$ L | I          | S  | S    | UCST                  |
| 2.83 mg |                     | 566 $\mu$ L | P          | S  | S    |                       |
| 2.25 mg | 2-methyl-1-propanol | 90 $\mu$ L  | I          | I  | S    | UCST                  |
| 3.41 mg |                     | 341 $\mu$ L | I          | I  | S    | UCST                  |
| 2.86 mg |                     | 572 $\mu$ L | I          | I  | S    | UCST                  |
| 3.20 mg | ethylene glycol     | 88 $\mu$ L  | S          | S  | S    |                       |
| 3.13 mg |                     | 313 $\mu$ L | S          | S  | S    |                       |
| 3.10 mg |                     | 620 $\mu$ L | S          | S  | S    |                       |
| 2.45 mg | glycerol            | 98 $\mu$ L  | F          | I  | S    | UCST                  |
| 2.30 mg |                     | 230 $\mu$ L | F          | I  | S    | UCST                  |
| 2.43 mg | 1-hexanol           | 99 $\mu$ L  | I          | I  | I    |                       |

**Table S3.** Thermo-responsiveness of **PHEMA** in mixed solvent.

| polymer | solvent<br>(mol. ratio)    | volume      | solubility |    |      | Thermo-responsiveness |
|---------|----------------------------|-------------|------------|----|------|-----------------------|
|         |                            |             | cool       | rt | heat |                       |
| 2.37 mg | DMF : DCE = 3.0 : 7.0      | 95 $\mu$ L  | S          | S  | S    |                       |
| 2.73 mg | DMF : DCE = 2.5 : 7.5      | 110 $\mu$ L | S          | S  | S    |                       |
| 3.09 mg | DMF : DCE = 2.2 : 7.8      | 120 $\mu$ L | S          | S  | S    |                       |
| 2.85 mg | DMF : DCE = 2.1 : 7.9      | 115 $\mu$ L | S          | S  | S    |                       |
| 2.97 mg | DMF : DCE = 2.0 : 8.0      | 120 $\mu$ L | S          | I  | I    | LCST                  |
| 2.96 mg | DMF : DCE = 1.0 : 9.0      | 120 $\mu$ L | I          | I  | I    |                       |
| 3.10 mg | methanol : DCE = 5.0 : 5.0 | 125 $\mu$ L | S          | S  | S    |                       |
| 2.44 mg | methanol : DCE = 4.0 : 6.0 | 100 $\mu$ L | S          | S  | I    | LCST                  |
| 3.32 mg | methanol : DCE = 3.5 : 6.5 | 130 $\mu$ L | S          | S  | I    | LCST                  |
| 3.97 mg | methanol : DCE = 3.0 : 7.0 | 160 $\mu$ L | S          | I  | I    | LCST                  |
| 3.72 mg | ethanol : DCE = 4.0 : 6.0  | 150 $\mu$ L | S          | S  | S    |                       |
| 3.02 mg | ethanol : DCE = 3.0 : 7.0  | 120 $\mu$ L | S          | S  | I    | LCST                  |
| 4.03 mg | ethanol : DCE = 2.0 : 8.0  | 160 $\mu$ L | I          | I  | I    |                       |

|         |                                          |              |   |   |   |              |
|---------|------------------------------------------|--------------|---|---|---|--------------|
| 3.38 mg | 1-propanol : DCE = 4.0 : 6.0             | 135 $\mu$ L  | S | S | S |              |
| 25.51mg | 1-propanol : DCE = 3.0 : 7.0             | 1000 $\mu$ L | S | S | I | LCST (67 °C) |
| 21.13mg | 1-propanol : DCE = 2.8 : 7.6             | 845 $\mu$ L  | S | S | I | LCST (52 °C) |
| 20.30mg | 1-propanol : DCE = 2.6 : 7.4             | 810 $\mu$ L  | S | S | I | LCST (33 °C) |
| 20.52mg | 1-propanol : DCE = 2.5 : 7.5             | 820 $\mu$ L  | S | S | I | LCST (26 °C) |
| 20.72mg | 1-propanol : DCE = 2.4 : 7.6             | 830 $\mu$ L  | I | I | I |              |
| 4.89 mg | 1-propanol : DCE = 2.0 : 8.0             | 195 $\mu$ L  | I | I | I |              |
| 5.03 mg | morpholine : DCE = 5.0 : 5.0             | 200 $\mu$ L  | S | S | S |              |
| 2.51 mg | morpholine : DCE = 4.0 : 6.0             | 100 $\mu$ L  | S | S | S |              |
| 2.79 mg | morpholine : DCE = 3.0 : 7.0             | 110 $\mu$ L  | S | S | S |              |
| 3.60 mg | morpholine : DCE = 2.0 : 8.0             | 145 $\mu$ L  | S | S | I | LCST         |
| 3.45 mg | morpholine : DCE = 1.0 : 9.0             | 140 $\mu$ L  | I | I | I |              |
| 3.94 mg | benzylamine : DCE = 5.0 : 5.0            | 155 $\mu$ L  | S | S | S |              |
| 4.11 mg | benzylamine : DCE = 4.0 : 6.0            | 165 $\mu$ L  | S | S | S |              |
| 2.34 mg | benzylamine : DCE = 3.0 : 7.0            | 95 $\mu$ L   | S | S | S |              |
| 2.32 mg | benzylamine : DCE = 2.0 : 8.0            | 95 $\mu$ L   | S | S | I | LCST         |
| 2.90 mg | benzylamine : DCE = 1.0 : 9.0            | 115 $\mu$ L  | I | I | I |              |
| 2.74 mg | acetic acid : DCE = 9.0 : 1.0            | 110 $\mu$ L  | S | S | S |              |
| 2.61 mg | acetic acid : DCE = 8.0 : 2.0            | 105 $\mu$ L  | S | S | S |              |
| 3.08 mg | acetic acid : DCE = 7.0 : 3.0            | 120 $\mu$ L  | I | S | S | UCST         |
| 2.43 mg | acetic acid : DCE = 6.0 : 4.0            | 100 $\mu$ L  | I | I | S | UCST         |
| 2.51 mg | 1-butanol : DCE = 3.5 : 6.5              | 100 $\mu$ L  | S | S | S |              |
| 2.10 mg | 1-butanol : DCE = 3.0 : 7.0              | 84 $\mu$ L   | S | S | I | LCST         |
| 2.35 mg | 1-butanol : DCE = 2.5 : 7.5              | 94 $\mu$ L   | S | S | I | LCST         |
| 2.48 mg | 1-butanol : DCE = 2.0 : 8.0              | 99 $\mu$ L   | P | P | I |              |
| 2.51 mg | 1-butanol : DCE = 1.5 : 8.5              | 100 $\mu$ L  | I | I | I |              |
| 2.23 mg | 2-butanol : DCE = 3.5 : 6.5              | 89 $\mu$ L   | S | S | S |              |
| 1.90 mg | 2-butanol : DCE = 3.0 : 7.0              | 76 $\mu$ L   | S | S | I | LCST         |
| 2.45 mg | 2-butanol : DCE = 2.5 : 7.5              | 98 $\mu$ L   | S | S | I | LCST         |
| 2.53 mg | 2-butanol : DCE = 2.0 : 8.0              | 101 $\mu$ L  | S | P | I | LCST         |
| 2.58 mg | 2-butanol : DCE = 1.5 : 8.5              | 103 $\mu$ L  | I | I | I |              |
| 2.47 mg | 2 methyl-1-propanol : DCE =<br>3.5 : 6.5 | 99 $\mu$ L   | S | S | S |              |
| 2.33 mg | 2 methyl-1-propanol : DCE =<br>3.0 : 7.0 | 93 $\mu$ L   | S | S | I | LCST         |
| 2.14 mg | 2 methyl-1-propanol : DCE =<br>2.5 : 7.5 | 86 $\mu$ L   | S | S | I | LCST         |
| 2.34 mg | 2 methyl-1-propanol : DCE =              | 94 $\mu$ L   | P | P | I |              |

|         |                             |             |   |   |   |
|---------|-----------------------------|-------------|---|---|---|
|         | 2.0 : 8.0                   |             |   |   |   |
| 2.56 mg | 2 methyl-1-propanol : DCE = | 102 $\mu$ L | I | I | I |
|         | 1.5 : 8.5                   |             |   |   |   |

**Table S4.** Composition of solution.

| polymer  | solvent    | volume      | concentration |
|----------|------------|-------------|---------------|
| 23.14 mg | 1-propanol | 930 $\mu$ L | 24.9 mg/mL    |

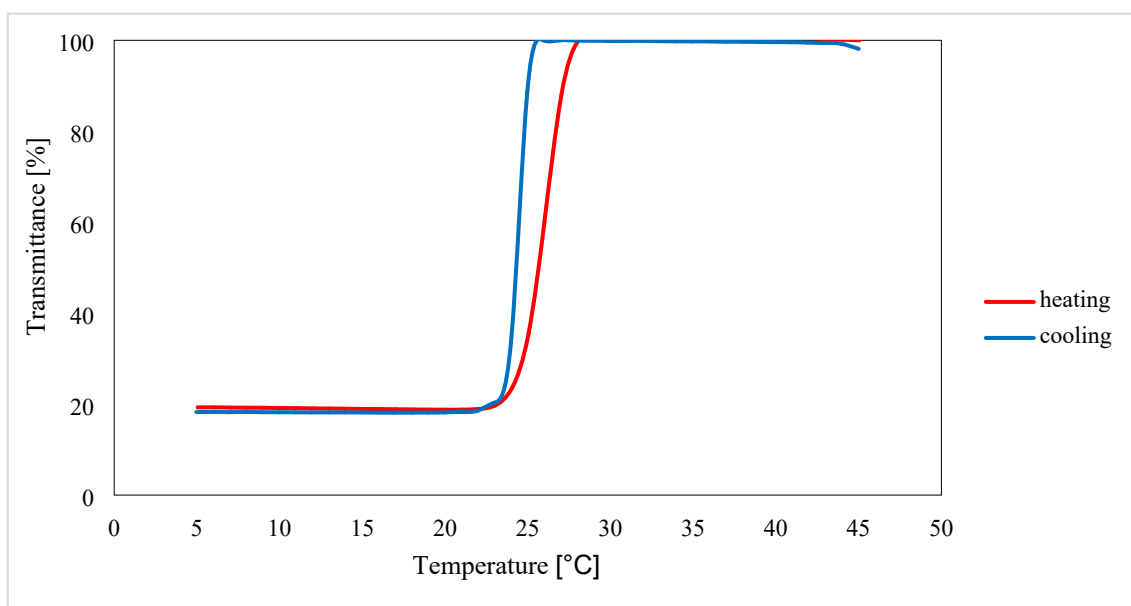

**Figure S6.** Transmittance change of **PHEMA** in 1-propanol at 800 nm.



#### 4. Temperature-dependent particle size change of PHEMA

**Table S5.** Composition of solution.

| polymer  | solvent (mol. ratio)         |             | concentration |
|----------|------------------------------|-------------|---------------|
| 24.39 mg | 1-propanol : DCE = 3.0 : 7.0 | 980 $\mu$ L | 25 mg/mL      |

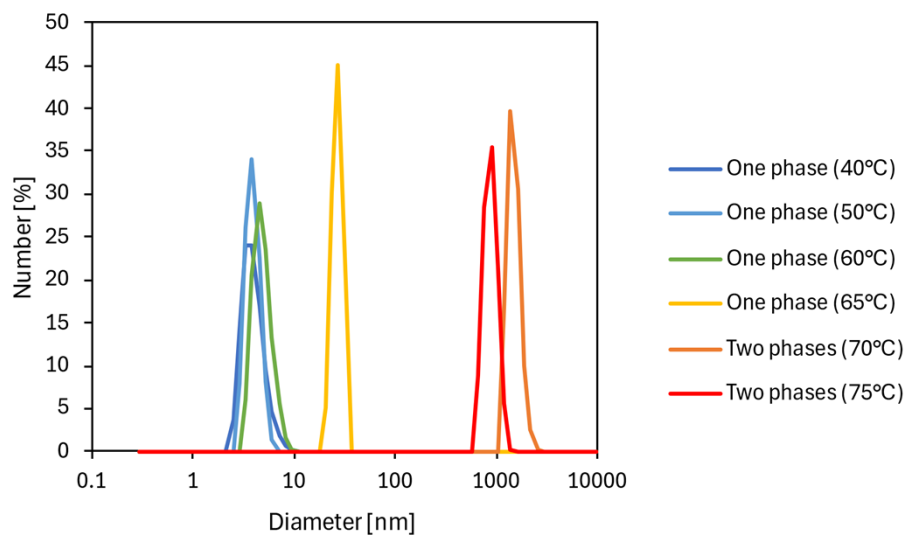

**Figure S7.** Size distribution by number of **PHEMA** in 1-propanol and DCE.

## 5. Polymer concentration dependence on Thermo-responsiveness of poly(hydroxyalkyl (meth)acrylate)s

**Table S6.** Measurement conditions: 1-propanol:DCE = 2.8:7.2.

| PHEMA    | solvent      | Conc.     | solubility |      |      | Thermo-responsiveness |
|----------|--------------|-----------|------------|------|------|-----------------------|
|          |              |           | cool       | r.t. | heat |                       |
| 10.58 mg | 1060 $\mu$ L | 10 mg/mL  | S          | S    | I    | LCST                  |
| 21.13 mg | 845 $\mu$ L  | 25 mg/mL  | S          | S    | I    | LCST                  |
| 41.7 mg  | 835 $\mu$ L  | 50 mg/mL  | S          | S    | I    | LCST                  |
| 61.0 mg  | 815 $\mu$ L  | 75 mg/mL  | S          | S    | I    | LCST                  |
| 82.0 mg  | 820 $\mu$ L  | 100 mg/mL | I          | I    | I    | insoluble             |

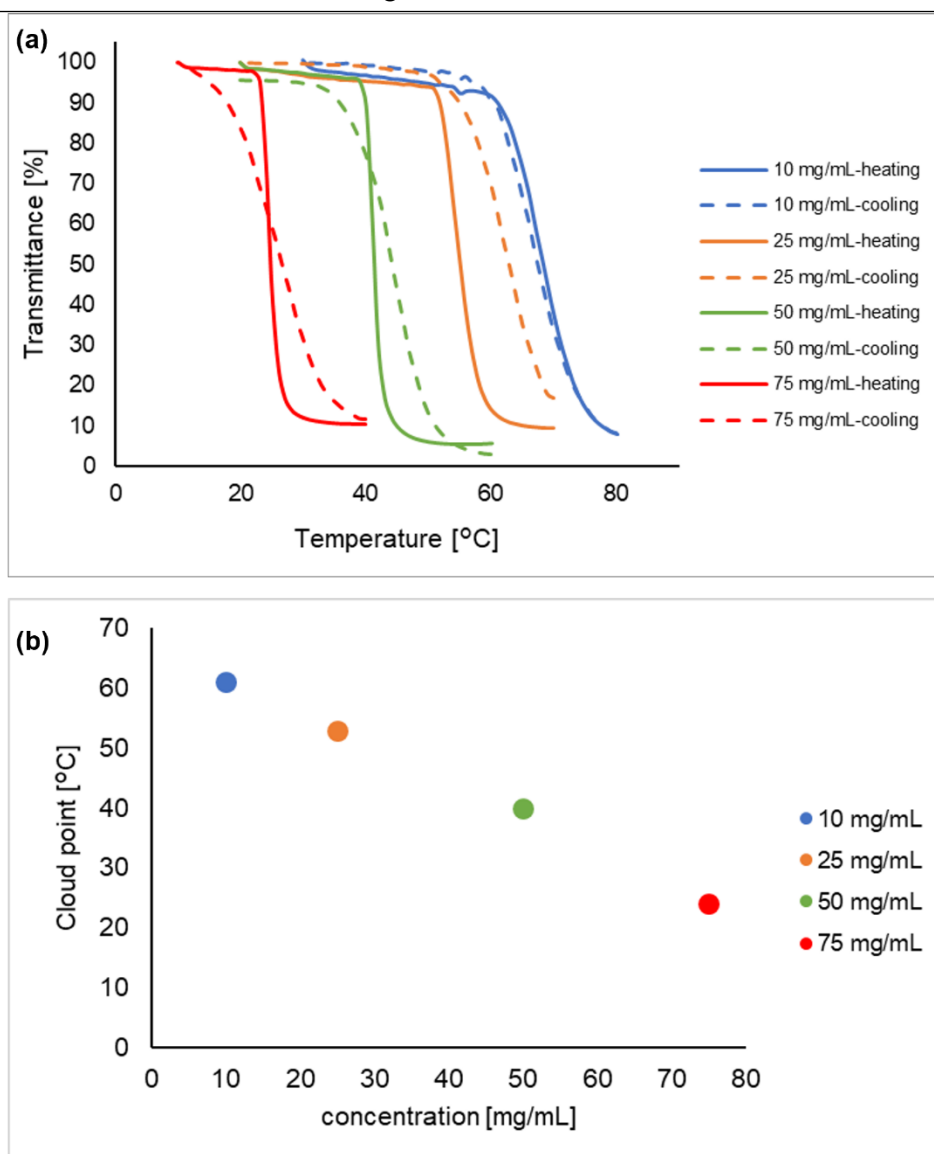

**Figure S8.** (a) Transmittance change at 800 nm of PHEMA in 1-propanol:DCE (mol. ratio: 2.8:7.2) with the increased polymer concentration from 10 mg/mL to 75 mg/mL. (b) The effects of polymer concentration on the change of the cloud point in the heating process (90% of transmission).

## 6. The effect of molecular weight on the thermo-responsiveness of PHEMA

### 6-1. Preparation of lower molecular weight of Poly(2-hydroxyethyl methacrylate) (sPHEMA)

A solution of 2-hydroxyethyl methacrylate (3.0 g, 23.3 mmol), AIBN (3.47 mg, 0.021 mmol), 4-Cyano-4-[(dodecylsulfanylthiocarbonyl)sulfanyl]pentanoic Acid (92.2 mg, 0.23 mmol) in DMAc (6 mL) was prepared in an ampule. The ampule was degassed with three freeze-evacuate-thaw cycles and sealed. The reaction mixture was stirred at 80 °C for 24 h. After the ampule was cooled, the mixture was diluted with MeOH and reprecipitated with diethyl ether. Filtration and drying in vacuo afforded **sPHEMA** (3.10 g, quant).

$^1\text{H NMR}$  (DMSO- $d_6$ , 400 MHz)  $\delta$  = 4.70-4.94 (m, 1H), 3.73-4.26 (m, 2H), 3.47-3.73 (m, 2H), 1.37-2.24 (m, 2H), 0.48-1.07 (m, 3H).

SEC (DMF):  $M_n = 8.22 \times 10^3$ ,  $M_w = 7.07 \times 10^3$ , PDI = 1.13.

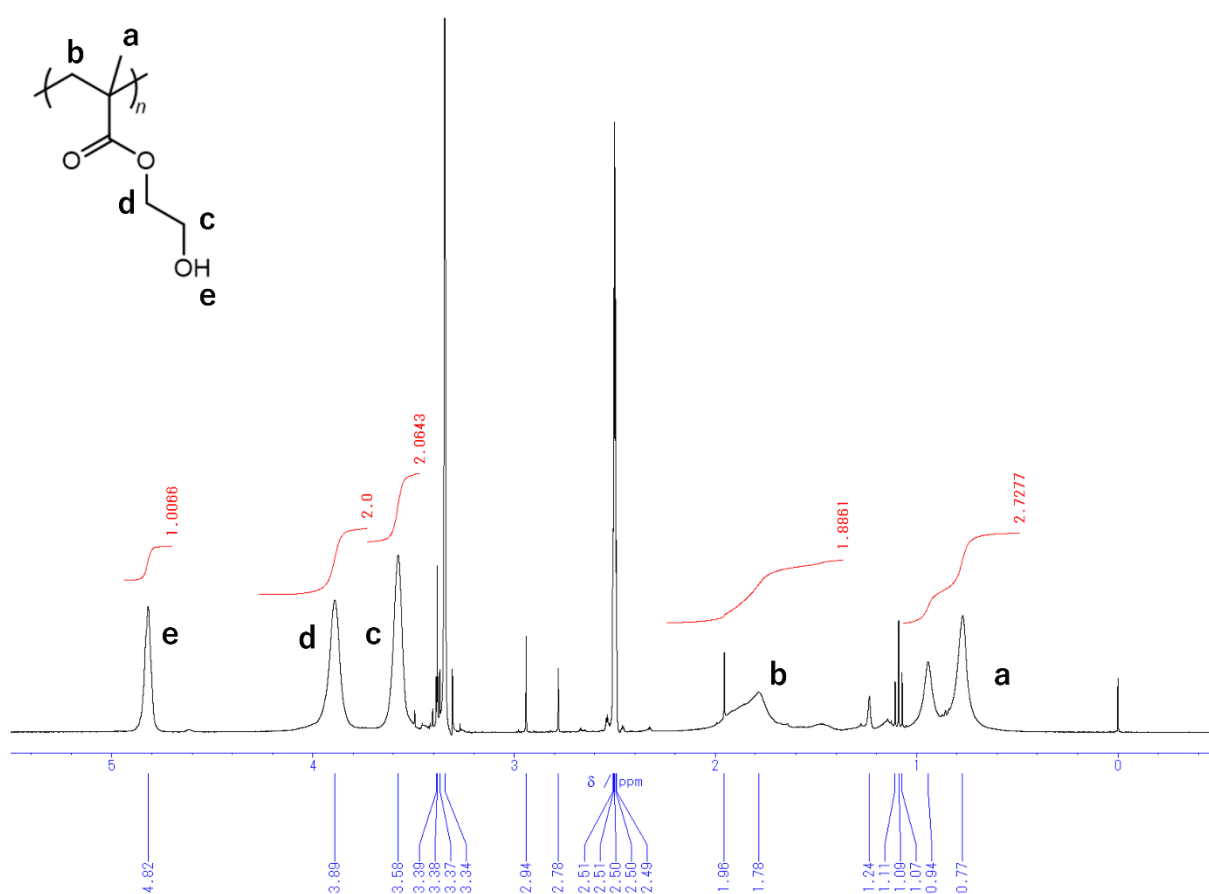

**Figure S9a.**  $^1\text{H NMR}$  spectrum of sPHEMA

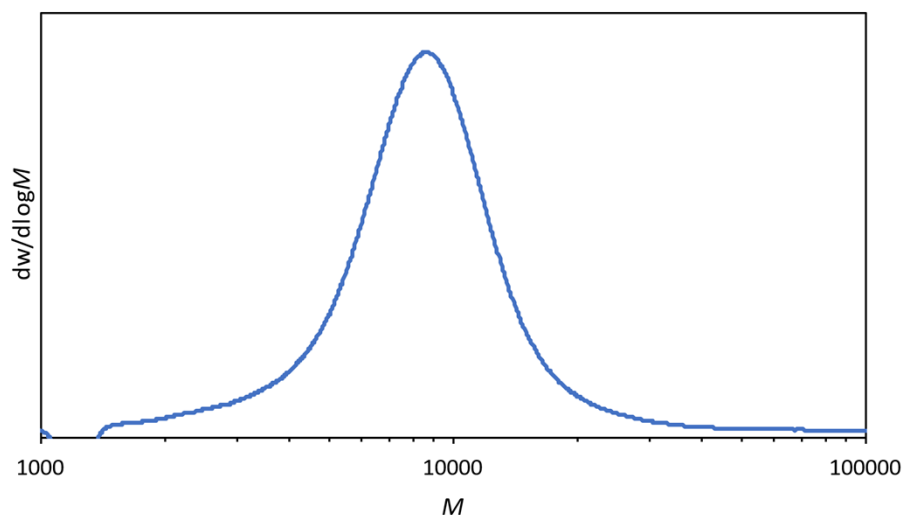

**Figure S9b.** SEC chromatogram of sPHEMA

## 6-2. Thermo-responsiveness of sPHEMA

**Table S7.** Thermo-responsiveness of sPHEMA in mixed solvent.

| polymer | solvent<br>(mol. ratio)      | volume      | solubility |    |      | Thermo-<br>responsiveness |
|---------|------------------------------|-------------|------------|----|------|---------------------------|
|         |                              |             | cool       | rt | heat |                           |
| 4.80 mg | methanol : DCE = 5.0 : 5.0   | 95 $\mu$ L  | S          | S  | S    |                           |
| 4.99 mg | methanol : DCE = 4.0 : 6.0   | 100 $\mu$ L | S          | S  | I    | LCST                      |
| 4.79 mg | methanol : DCE = 3.0 : 7.0   | 95 $\mu$ L  | I          | I  | I    |                           |
| 4.76 mg | ethanol : DCE = 4.0 : 6.0    | 95 $\mu$ L  | S          | S  | S    |                           |
| 4.84 mg | ethanol : DCE = 3.0 : 7.0    | 95 $\mu$ L  | S          | S  | I    | LCST                      |
| 5.73 mg | ethanol : DCE = 2.0 : 8.0    | 115 $\mu$ L | I          | I  | I    |                           |
| 5.05 mg | 1-propanol : DCE = 4.0 : 6.0 | 100 $\mu$ L | S          | S  | S    |                           |
| 4.85 mg | 1-propanol : DCE = 3.0 : 7.0 | 95 $\mu$ L  | S          | S  | S    |                           |
| 5.11 mg | 1-propanol : DCE = 2.5 : 7.5 | 100 $\mu$ L | S          | S  | I    | LCST                      |
| 5.65 mg | 1-propanol : DCE = 2.0 : 8.0 | 115 $\mu$ L | I          | I  | I    |                           |

**Table S8.** Composition of solution.

| polymer | solvent (mol. ratio)         | concentration |
|---------|------------------------------|---------------|
| 41.6 mg | 1-propanol : DCE = 2.5 : 7.5 | 815 $\mu$ L   |

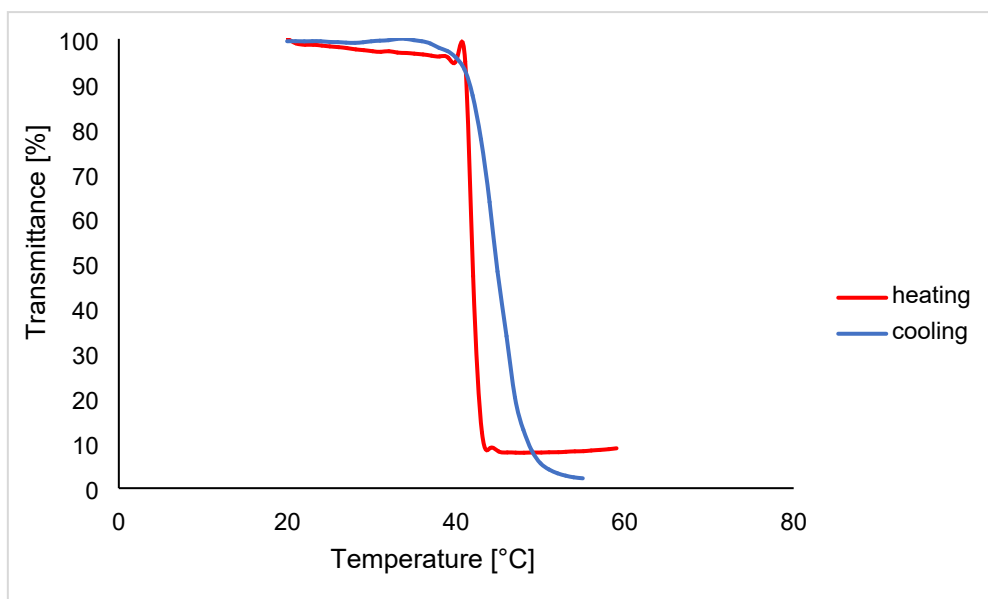

**Figure S10.** Transmittance change of **sPHEMA** in 1-propanol and DCE at 800 nm.

### 6-3. Comparison of PHEMA and sPHEMA on their thermo-responsiveness

Since only  $M_v$  was listed on the website for commercially available **PHEMA** concerning their molecular weight, we conducted SEC measurement of **PHEMA** and calculated  $M_n$ ,  $M_w$ , and PDI.

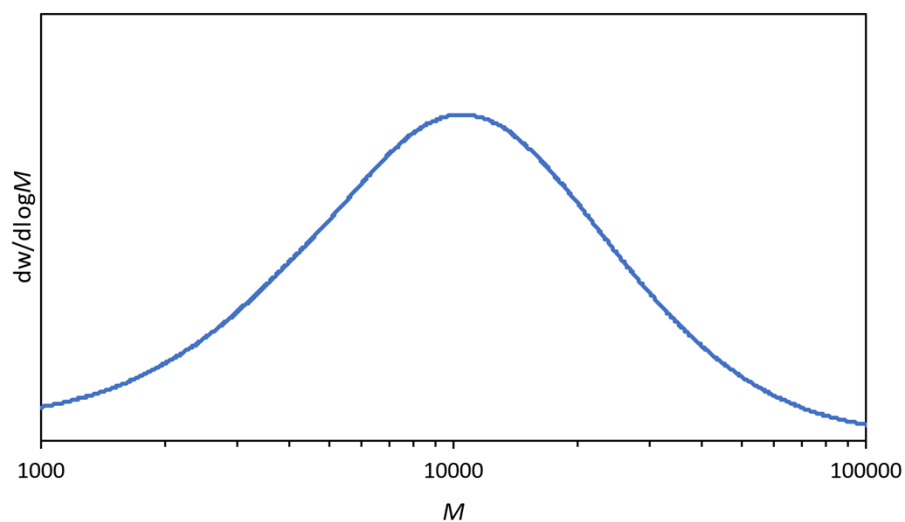

SEC (DMF):  $M_n = 7.63 \times 10^3$ ,  $M_w = 1.53 \times 10^4$ , PDI = 2.00.

**Figure S11.** SEC chromatogram of commercially available **PHEMA**

**Table S9.** The effect of molecular weight on the thermo-responsiveness.<sup>a</sup>

| Polymer       | $M_w$ ( $\times 10^3$ ) | Solvent (mol. ratio)         | Thermo-responsiveness |
|---------------|-------------------------|------------------------------|-----------------------|
| <b>PHEMA</b>  | 15.3                    | 1-propanol : DCE = 2.8 : 7.2 | LCST (40 °C)          |
| <b>sPHEMA</b> | 8.22                    | 1-propanol : DCE = 2.5 : 7.5 | LCST (42 °C)          |

<sup>a</sup> Concentration: 50-51 mg/mL, 800 nm, scan rate: 1.5 °C

As shown in **Table S9**, both **PHEMA** and **sPHEMA** exhibited LCST-type phase separation in 1-propanol/DCE binary solvent at almost the same cloud point (ca. 40 °C). Because of its lower molecular weight, **sPHEMA** had a higher solubility in 1-propanol/DCE and a lower molar ratio of 1-propanol on the LCST-type phase separation than **PHEMA**.

## 7. Solubility and Thermo-responsiveness of poly(hydroxyalkyl (meth)acrylate)s

### 7-1. Summary of solubility of poly(hydroxyalkyl (meth)acrylate)s in a series of primary aliphatic alcohols

**Table S10.** Solubility of poly(hydroxyalkyl methacrylate)s (25 mg/mL, rt).

|            | <b>PHEMA</b> | <b>P3MA</b> | <b>P4MA</b> | <b>P5MA</b> |
|------------|--------------|-------------|-------------|-------------|
| methanol   | S            | S           | S           | S           |
| ethanol    | S            | S           | S           | S           |
| 1-propanol | S            | S           | S           | S           |
| 1-butanol  | I            | S           | S           | S           |
| 1-hexanol  | I            | I           | S           | S           |
| 1-octanol  | I            | I           | I           | S           |

**Table S11.** Solubility of poly(hydroxyalkyl acrylate)s (25 mg/mL, rt).

|            | <b>P3A</b> | <b>P4A</b> |
|------------|------------|------------|
| methanol   | S          | S          |
| ethanol    | S          | S          |
| 1-propanol | S          | S          |
| 1-butanol  | S          | S          |
| 1-hexanol  | I          | S          |
| 1-octanol  | I          | I          |

## 7-2. Thermo-responsiveness of P3MA

**Table S12.** Thermo-responsiveness of **P3MA** in mixed solvent.

| polymer | solvent<br>(mol. ratio)             | volume      | solubility |    |      | Thermo-<br>responsiveness |
|---------|-------------------------------------|-------------|------------|----|------|---------------------------|
|         |                                     |             | cool       | rt | heat |                           |
| 5.19 mg | methanol : DCE = 5.0 : 5.0          | 105 $\mu$ L | S          | S  | S    |                           |
| 5.63 mg | methanol: DCE = 4.0 : 6.0           | 115 $\mu$ L | S          | S  | I    | LCST                      |
| 6.05 mg | methanol: DCE = 3.0 : 7.0           | 120 $\mu$ L | I          | I  | I    |                           |
| 4.90 mg | ethanol : DCE = 4.0 : 6.0           | 100 $\mu$ L | S          | S  | S    |                           |
| 4.84 mg | ethanol: DCE = 3.7 : 6.3            | 95 $\mu$ L  | S          | S  | I    | LCST                      |
| 4.86 mg | ethanol: DCE = 3.5 : 6.5            | 95 $\mu$ L  | S          | I  | I    | LCST                      |
| 5.05 mg | ethanol: DCE = 3.0 : 7.0            | 100 $\mu$ L | I          | I  | I    |                           |
| 5.18 mg | ethanol: DCE = 2.0 : 8.0            | 105 $\mu$ L | I          | I  | I    |                           |
| 4.77 mg | 1-propanol : DCE = 4.0 : 6.0        | 95 $\mu$ L  | S          | S  | S    |                           |
| 5.30 mg | 1-propanol: DCE = 3.5 : 6.5         | 105 $\mu$ L | S          | S  | I    | LCST                      |
| 5.32 mg | 1-propanol: DCE = 3.3 : 6.7         | 105 $\mu$ L | S          | S  | I    | LCST                      |
| 5.07 mg | 1-propanol: DCE = 3.0 : 7.0         | 100 $\mu$ L | I          | I  | I    |                           |
| 5.47 mg | 1-butanol: DCE = 4.0 : 6.0          | 110 $\mu$ L | S          | S  | S    |                           |
| 5.12 mg | 1-butanol: DCE = 3.0 : 7.0          | 100 $\mu$ L | S          | S  | I    | LCST                      |
| 4.83 mg | ethanol : toluene = 7.0 : 3.0       | 95 $\mu$ L  | S          | S  | S    |                           |
| 7.00 mg | ethanol : toluene = 6.0 : 4.0       | 140 $\mu$ L | S          | S  | I    | LCST                      |
| 5.39 mg | ethanol : toluene = 5.8 : 4.2       | 110 $\mu$ L | I          | I  | I    |                           |
| 5.23 mg | ethanol : toluene = 5.0 : 5.0       | 105 $\mu$ L | I          | I  | I    |                           |
| 4.64 mg | 1-propanol : toluene =<br>7.0 : 3.0 | 95 $\mu$ L  | S          | S  | S    |                           |
| 7.49 mg | 1-propanol : toluene =<br>6.0 : 4.0 | 150 $\mu$ L | S          | S  | I    | LCST                      |
| 5.14 mg | 1-propanol : toluene =<br>5.9 : 4.1 | 100 $\mu$ L | S          | S  | I    | LCST                      |
| 5.67 mg | 1-propanol : toluene =<br>5.8 : 4.2 | 115 $\mu$ L | S          | S  | I    | LCST                      |
| 5.67 mg | 1-propanol : toluene =<br>5.0 : 5.0 | 115 $\mu$ L | I          | I  | I    |                           |
| 5.84 mg | 1-butanol : toluene = 7.0 : 3.0     | 115 $\mu$ L | S          | S  | S    |                           |
| 9.51 mg | 1-butanol : toluene = 6.0 : 4.0     | 190 $\mu$ L | S          | S  | I    | LCST                      |
| 5.76 mg | 1-butanol : toluene = 5.8 : 4.2     | 115 $\mu$ L | I          | I  | I    |                           |
| 4.69 mg | 1-butanol : toluene = 5.0 : 5.0     | 95 $\mu$ L  | I          | I  | I    |                           |



**Table S13.** Composition of solution.

| polymer  | solvent (mol. ratio)         | volume       | concentration |
|----------|------------------------------|--------------|---------------|
| 149.1 mg | 1-propanol : DCE = 3.5 : 6.5 | 2920 $\mu$ L | 51 mg/mL      |

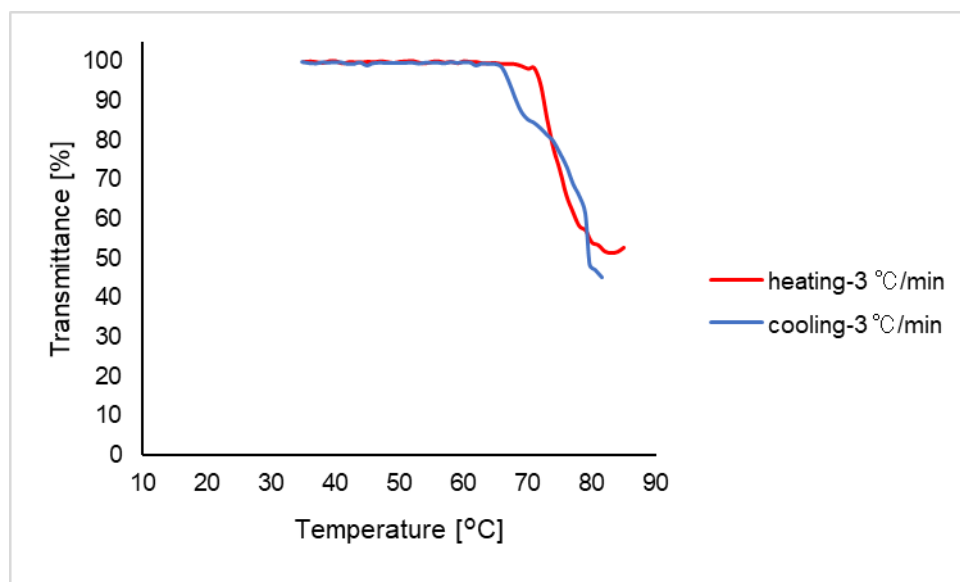

**Figure S12.** Transmittance change of P3MA in 1-propanol and DCE at 800 nm. (3 °C/min)

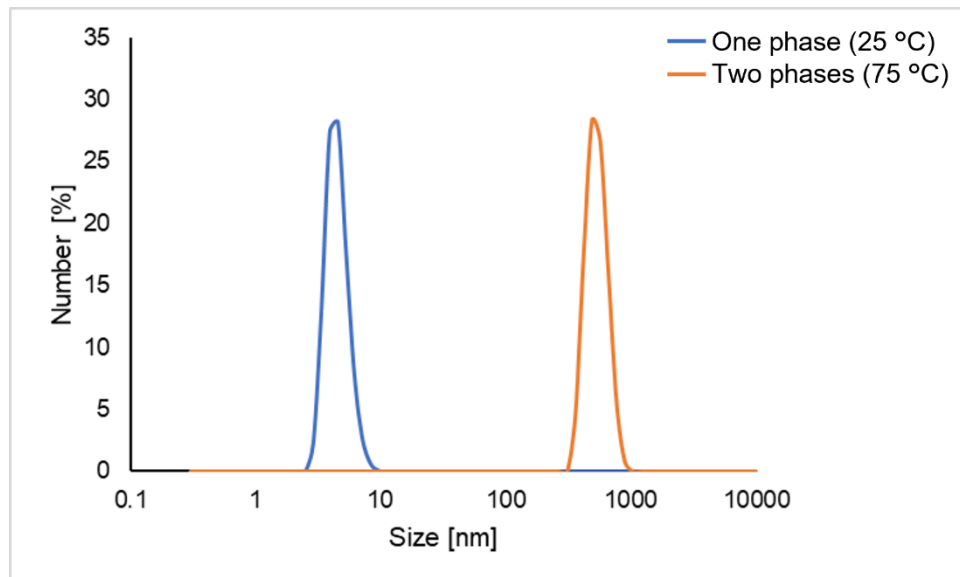

**Figure S13.** Size distribution by number of P3MA in 1-propanol and DCE.

### 7-3. Thermo-responsiveness of P4MA

**Table S14.** Thermo-responsiveness of **P4MA** in mixed solvent.

| polymer | solvent<br>(mol. ratio)             | volume      | solubility |    |      | Thermo-<br>responsiveness |
|---------|-------------------------------------|-------------|------------|----|------|---------------------------|
|         |                                     |             | cool       | rt | heat |                           |
| 5.15 mg | methanol : DCE = 6.0 : 4.0          | 105 $\mu$ L | S          | S  | S    |                           |
| 5.12 mg | methanol : DCE = 5.0 : 5.0          | 100 $\mu$ L | S          | S  | S    |                           |
| 5.42 mg | methanol : DCE = 4.0 : 6.0          | 110 $\mu$ L | S          | S  | S    |                           |
| 5.09 mg | methanol : DCE = 3.0 : 7.0          | 100 $\mu$ L | S          | S  | I    | LCST                      |
| 4.96 mg | methanol : DCE = 2.0 : 8.0          | 100 $\mu$ L | I          | I  | I    |                           |
| 5.47 mg | ethanol : DCE = 4.0 : 6.0           | 110 $\mu$ L | S          | S  | S    |                           |
| 4.83 mg | ethanol : DCE = 3.0 : 7.0           | 95 $\mu$ L  | S          | S  | I    | LCST                      |
| 5.70 mg | ethanol : DCE = 2.7 : 7.3           | 115 $\mu$ L | S          | S  | I    | LCST                      |
| 4.74 mg | ethanol : DCE = 2.5 : 7.5           | 95 $\mu$ L  | I          | I  | I    |                           |
| 4.77 mg | ethanol : DCE = 2.0 : 8.0           | 95 $\mu$ L  | I          | I  | I    |                           |
| 4.94 mg | 1-propanol : DCE = 4.0 : 6.0        | 100 $\mu$ L | S          | S  | S    |                           |
| 4.77 mg | 1-propanol : DCE = 3.0 : 7.0        | 95 $\mu$ L  | S          | S  | S    |                           |
| 5.15 mg | 1-propanol : DCE = 2.5 : 7.5        | 105 $\mu$ L | S          | S  | I    | LCST                      |
| 5.17 mg | 1-propanol : DCE = 2.0 : 8.0        | 105 $\mu$ L | I          | I  | I    |                           |
| 5.08 mg | 1-butanol : DCE = 3.0 : 7.0         | 100 $\mu$ L | S          | S  | S    |                           |
| 5.31 mg | 1-butanol : DCE = 2.5 : 7.5         | 105 $\mu$ L | S          | S  | I    | LCST                      |
| 5.42 mg | 1-butanol : DCE = 2.3 : 7.7         | 110 $\mu$ L | S          | I  | I    | LCST                      |
| 4.73 mg | 1-butanol : DCE = 2.0 : 8.0         | 95 $\mu$ L  | I          | I  | I    |                           |
| 4.84 mg | 1-hexanol : DCE = 3.0 : 7.0         | 95 $\mu$ L  | S          | S  | S    |                           |
| 5.49 mg | 1-hexanol : DCE = 2.0 : 8.0         | 110 $\mu$ L | S          | S  | I    | LCST                      |
| 5.70 mg | ethanol : toluene = 6.0 : 4.0       | 115 $\mu$ L | S          | S  | S    |                           |
| 5.98 mg | ethanol : toluene = 5.0 : 5.0       | 120 $\mu$ L | S          | S  | I    | LCST                      |
| 6.08 mg | ethanol : toluene = 4.5 : 5.5       | 120 $\mu$ L | S          | S  | I    | LCST                      |
| 6.37 mg | ethanol : toluene = 4.0 : 6.0       | 125 $\mu$ L | I          | I  | I    |                           |
| 5.46 mg | 1-propanol : toluene =<br>6.0 : 4.0 | 110 $\mu$ L | S          | S  | S    |                           |
| 4.75 mg | 1-propanol : toluene =<br>5.0 : 5.0 | 95 $\mu$ L  | S          | S  | S    |                           |
| 5.91 mg | 1-propanol : toluene =<br>4.0 : 6.0 | 120 $\mu$ L | S          | I  | I    | LCST                      |
| 5.19 mg | 1-butanol : toluene = 5.0 : 5.0     | 105 $\mu$ L | S          | S  | S    |                           |
| 5.85 mg | 1-butanol : toluene = 4.0 : 6.0     | 115 $\mu$ L | S          | S  | I    | LCST                      |
| 5.43 mg | 1-butanol : toluene = 3.0 : 7.0     | 110 $\mu$ L | I          | I  | I    |                           |

|         |                                 |                   |   |   |   |      |
|---------|---------------------------------|-------------------|---|---|---|------|
| 5.76 mg | 1-hexanol : toluene = 5.0 : 5.0 | 115 $\mu\text{L}$ | S | S | S |      |
| 5.80 mg | 1-hexanol : toluene = 4.5 : 5.5 | 115 $\mu\text{L}$ | S | S | I | LCST |
| 5.39 mg | 1-hexanol : toluene = 4.0 : 6.0 | 110 $\mu\text{L}$ | I | I | I |      |
| 6.28 mg | 1-hexanol : toluene = 3.0 : 7.0 | 125 $\mu\text{L}$ | I | I | I |      |

**Table S15.** Composition of solution.

| polymer  | solvent (mol. ratio)             | concentration      |
|----------|----------------------------------|--------------------|
| 154.2 mg | 1-propanol : toluene = 4.2 : 5.8 | 3020 $\mu\text{L}$ |

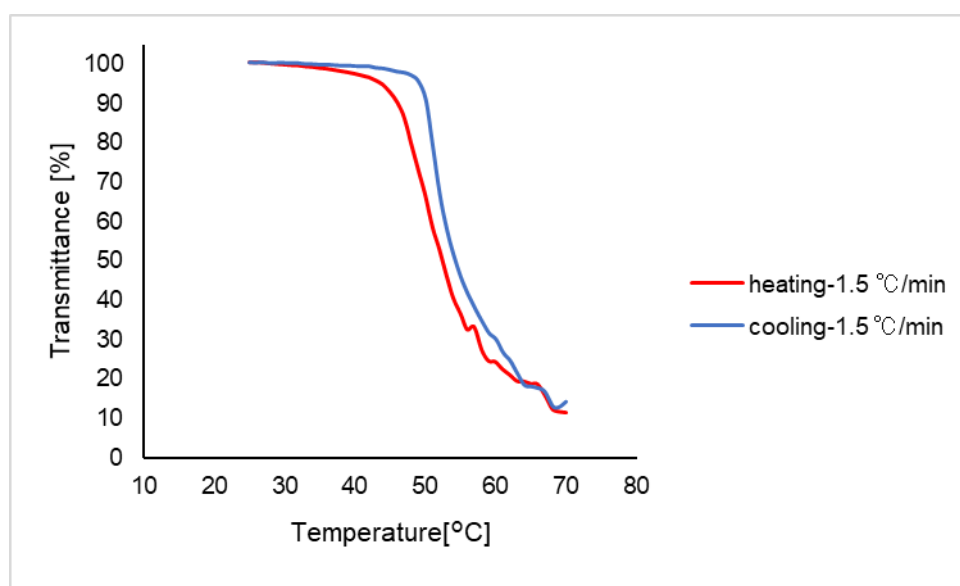

**Figure S14.** Transmittance change of P4MA in 1-propanol and toluene at 800 nm.

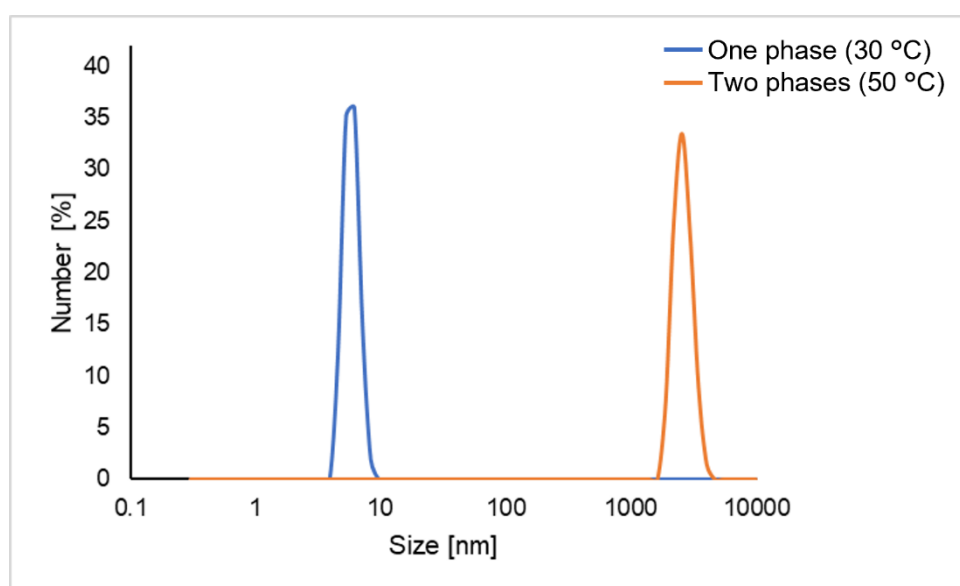

**Figure S15.** Size distribution by number of P4MA in 1-propanol and toluene.

#### 7-4. Thermo-responsiveness of P5MA

**Table S16.** Thermo-responsiveness of **P5MA** in mixed solvent.

| polymer | solvent<br>(mol. ratio)       | volume      | solubility |    |      | Thermo-<br>responsiveness |
|---------|-------------------------------|-------------|------------|----|------|---------------------------|
|         |                               |             | cool       | rt | heat |                           |
| 2.75 mg | methanol : DCE = 4.0 : 6.0    | 55 $\mu$ L  | S          | S  | S    |                           |
| 5.53 mg | methanol : DCE = 3.0 : 7.0    | 110 $\mu$ L | S          | S  | S    |                           |
| 5.09 mg | methanol : DCE = 2.8 : 7.2    | 100 $\mu$ L | S          | S  | I    | LCST                      |
| 5.15 mg | methanol : DCE = 2.0 : 8.0    | 105 $\mu$ L | I          | I  | I    |                           |
| 6.05 mg | ethanol : DCE = 4.0 : 6.0     | 120 $\mu$ L | S          | S  | S    |                           |
| 4.84 mg | ethanol : DCE = 3.0 : 7.0     | 95 $\mu$ L  | S          | S  | S    |                           |
| 5.67 mg | ethanol : DCE = 2.7 : 7.3     | 115 $\mu$ L | S          | S  | S    |                           |
| 5.39 mg | ethanol : DCE = 2.6 : 7.4     | 110 $\mu$ L | S          | S  | S    |                           |
| 4.69 mg | ethanol : DCE = 2.5 : 7.5     | 95 $\mu$ L  | I          | I  | I    |                           |
| 6.20 mg | ethanol : DCE = 2.0 : 8.0     | 125 $\mu$ L | I          | I  | I    |                           |
| 4.90 mg | 1-propanol : DCE = 4.0 : 6.0  | 100 $\mu$ L | S          | S  | S    |                           |
| 7.28 mg | 1-propanol : DCE = 3.0 : 7.0  | 145 $\mu$ L | S          | S  | S    |                           |
| 5.23 mg | 1-propanol : DCE = 2.5 : 7.5  | 105 $\mu$ L | S          | S  | S    |                           |
| 6.84 mg | 1-propanol : DCE = 2.4 : 7.6  | 135 $\mu$ L | S          | S  | S    |                           |
| 5.34 mg | 1-propanol : DCE = 2.3 : 7.7  | 105 $\mu$ L | S          | S  | S    |                           |
| 5.83 mg | 1-propanol : DCE = 2.0 : 8.0  | 115 $\mu$ L | I          | I  | I    |                           |
| 6.42 mg | 1-butanol : DCE = 3.0 : 7.0   | 130 $\mu$ L | S          | S  | S    |                           |
| 5.00 mg | 1-butanol : DCE = 2.2 : 7.8   | 100 $\mu$ L | S          | S  | S    |                           |
| 6.73 mg | 1-butanol : DCE = 2.1 : 7.9   | 135 $\mu$ L | S          | S  | S    |                           |
| 7.44 mg | 1-butanol : DCE = 2.0 : 8.0   | 150 $\mu$ L | I          | I  | I    |                           |
| 5.06 mg | 1-hexanol : DCE = 3.0 : 7.0   | 100 $\mu$ L | S          | S  | S    |                           |
| 5.24 mg | 1-hexanol : DCE = 2.0 : 8.0   | 105 $\mu$ L | S          | S  | S    |                           |
| 5.68 mg | 1-hexanol : DCE = 1.8 : 8.2   | 115 $\mu$ L | I          | I  | I    |                           |
| 5.34 mg | 1-hexanol : DCE = 1.5 : 8.5   | 105 $\mu$ L | I          | I  | I    |                           |
| 5.12 mg | 1-octanol : DCE = 2.0 : 8.0   | 100 $\mu$ L | S          | S  | S    |                           |
| 5.00 mg | 1-octanol : DCE = 1.7 : 8.3   | 100 $\mu$ L | I          | I  | I    |                           |
| 5.31 mg | 1-octanol : DCE = 1.5 : 8.5   | 105 $\mu$ L | I          | I  | I    |                           |
| 6.34 mg | 1-octanol : DCE = 1.0 : 9.0   | 125 $\mu$ L | I          | I  | I    |                           |
| 8.10 mg | ethanol : toluene = 6.0 : 4.0 | 160 $\mu$ L | S          | S  | S    |                           |
| 6.46 mg | ethanol : toluene = 5.0 : 5.0 | 130 $\mu$ L | I          | I  | I    |                           |
| 7.42 mg | ethanol : toluene = 4.5 : 5.5 | 150 $\mu$ L | S          | S  | S    |                           |
| 7.72 mg | ethanol : toluene = 4.3 : 5.7 | 155 $\mu$ L | S          | S  | I    | LCST                      |
| 5.15 mg | ethanol : toluene = 4.0 : 6.0 | 105 $\mu$ L | I          | I  | I    |                           |

|         |                                     |             |   |   |     |             |
|---------|-------------------------------------|-------------|---|---|-----|-------------|
| 6.05 mg | 1-propanol : toluene =<br>6.0 : 4.0 | 120 $\mu$ L | S | S | S   |             |
| 6.05 mg | 1-propanol : toluene =<br>5.0 : 5.0 | 110 $\mu$ L | S | S | S   |             |
| 4.86 mg | 1-propanol : toluene =<br>4.0 : 6.0 | 95 $\mu$ L  | S | S | I   | LCST        |
| 5.82 mg | 1-propanol : toluene =<br>3.8 : 6.2 | 115 $\mu$ L | S | S | I   | LCST        |
| 6.77 mg | 1-butanol : toluene = 6.0 : 4.0     | 135 $\mu$ L | S | S | S   |             |
| 5.49 mg | 1-butanol : toluene = 5.0 : 5.0     | 110 $\mu$ L | S | S | S   |             |
| 5.41 mg | 1-butanol : toluene = 4.0 : 6.0     | 110 $\mu$ L | S | S | S   |             |
| 5.60 mg | 1-butanol : toluene = 3.5 : 6.5     | 110 $\mu$ L | S | S | I   | LCST        |
| 6.09 mg | 1-butanol : toluene = 3.0 : 7.0     | 120 $\mu$ L | I | I | I   |             |
| 5.35 mg | 1-hexanol : toluene = 5.0 : 5.0     | 105 $\mu$ L | S | S | S   |             |
| 6.86 mg | 1-hexanol : toluene = 4.0 : 6.0     | 135 $\mu$ L | S | S | S   |             |
| 6.14 mg | 1-hexanol : toluene = 3.5 : 6.5     | 125 $\mu$ L | S | S | I   | LCST        |
| 5.10 mg | 1-hexanol : toluene = 3.0 : 7.0     | 100 $\mu$ L | I | I | I   |             |
| 6.78 mg | 1-octanol : toluene = 5.0 : 5.0     | 135 $\mu$ L | S | S | S   |             |
| 5.46 mg | 1-octanol : toluene = 4.0 : 6.0     | 110 $\mu$ L | I | I | S→I | LCST & UCST |
| 4.80 mg | 1-octanol : toluene = 3.5 : 6.5     | 95 $\mu$ L  | I | I | I   |             |
| 5.02 mg | 1-octanol : toluene = 3.0 : 7.0     | 100 $\mu$ L | I | I | I   |             |

**Table S17.** Composition of solution.

| polymer  | solvent (mol. ratio)             | concentration            |
|----------|----------------------------------|--------------------------|
| 152.6 mg | 1-propanol : toluene = 3.8 : 4.2 | 3000 $\mu$ L<br>51 mg/mL |

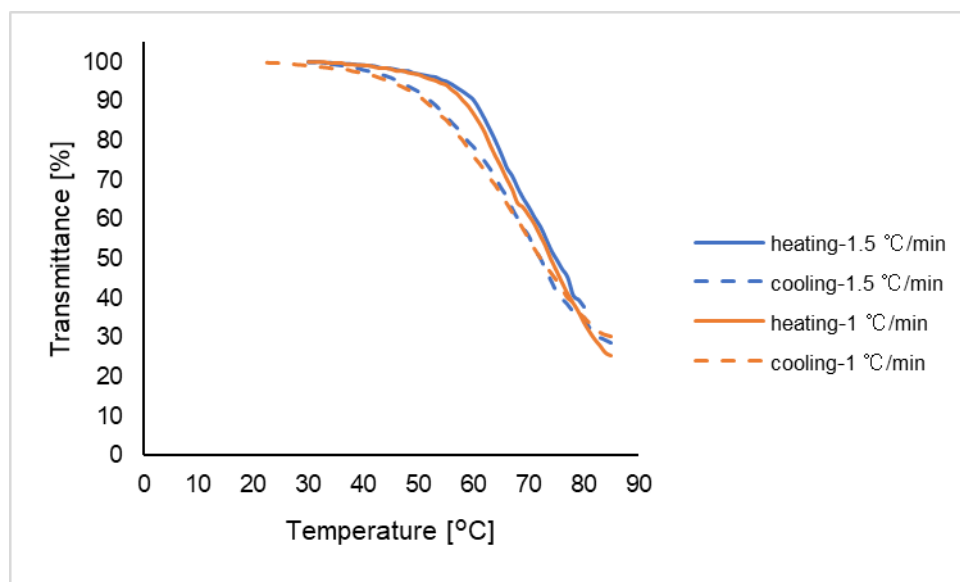

**Figure S16.** Transmittance change of **P5MA** in 1-propanol and toluene at 800 nm.

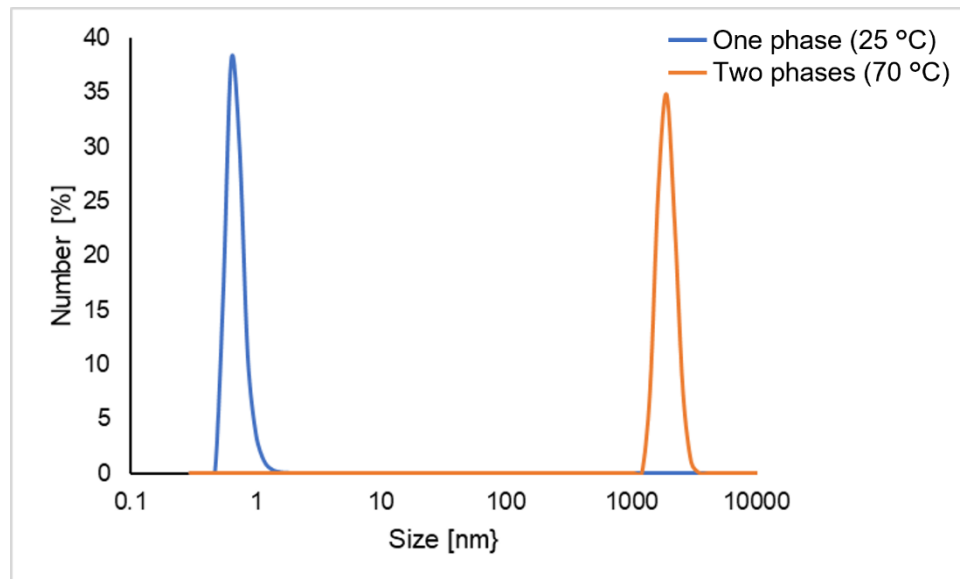

**Figure S17.** Size distribution by number of **P5MA** in 1-propanol and toluene.

## 7-5. Thermo-responsiveness of P3A

**Table S18.** Thermo-responsiveness of **P3A** in the mixed solvent.

| polymer | solvent<br>(mol. ratio)      | volume      | solubility |    |      | Thermo-<br>responsiveness |
|---------|------------------------------|-------------|------------|----|------|---------------------------|
|         |                              |             | cool       | rt | heat |                           |
| 4.62 mg | methanol : DCE = 5.0 : 5.0   | 90 $\mu$ L  | S          | S  | S    |                           |
| 4.71 mg | methanol : DCE = 4.0 : 6.0   | 95 $\mu$ L  | S          | S  | I    | LCST                      |
| 4.79 mg | methanol : DCE = 3.0 : 7.0   | 95 $\mu$ L  | I          | I  | I    |                           |
| 5.79 mg | ethanol : DCE = 5.0 : 5.0    | 115 $\mu$ L | S          | S  | S    |                           |
| 5.09 mg | ethanol : DCE = 4.0 : 6.0    | 100 $\mu$ L | S          | S  | S    |                           |
| 6.26 mg | ethanol : DCE = 3.0 : 7.0    | 125 $\mu$ L | S          | I  | I    | LCST                      |
| 5.18 mg | 1-propanol : DCE = 4.0 : 6.0 | 105 $\mu$ L | S          | S  | S    |                           |
| 5.79 mg | 1-propanol : DCE = 3.0 : 7.0 | 115 $\mu$ L | S          | S  | I    | LCST                      |
| 5.26 mg | 1-butanol : DCE = 4.0 : 6.0  | 105 $\mu$ L | S          | S  | S    |                           |
| 5.57 mg | 1-butanol : DCE = 3.0 : 7.0  | 110 $\mu$ L | S          | S  | I    | LCST                      |
| 6.07 mg | 1-butanol : DCE = 2.0 : 8.0  | 120 $\mu$ L | I          | I  | I    |                           |

**Table S19.** Composition of solution.

| polymer  | solvent (mol. ratio)         | concentration |
|----------|------------------------------|---------------|
| 154.8 mg | 1-propanol : DCE = 3.0 : 7.0 | 3000 $\mu$ L  |
|          |                              | 52 mg/mL      |

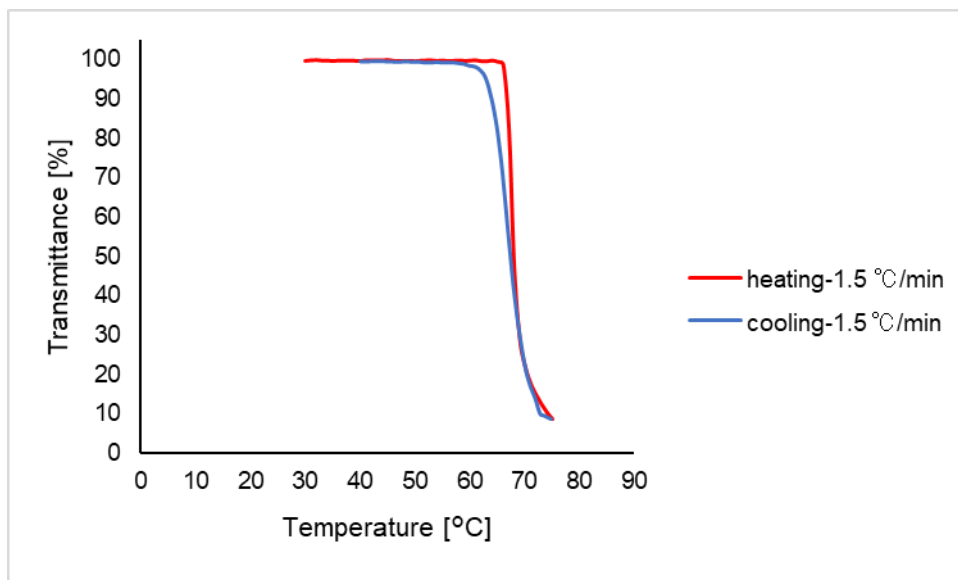

**Figure S18.** Transmittance change of **P3A** in 1-propanol and DCE at 800 nm.

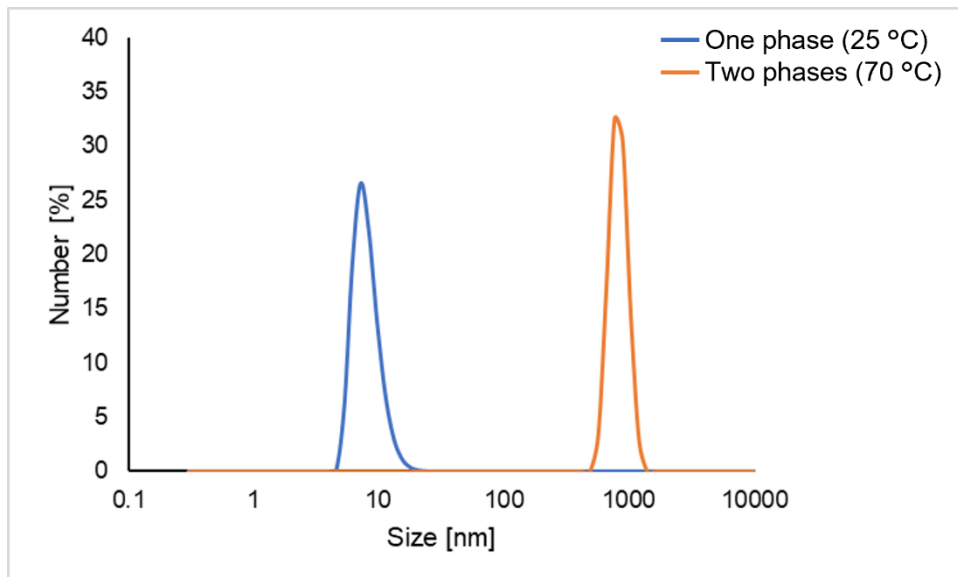

**Figure S19.** Size distribution by number of **P3A** in 1-propanol and DCE.



## 7-6. Thermo-responsiveness of P4A

**Table S20.** Thermo-responsiveness of **P4A** in mixed solvent.

| polymer | solvent<br>(mol. ratio)      | volume      | solubility |    |      | Thermo-<br>responsiveness |
|---------|------------------------------|-------------|------------|----|------|---------------------------|
|         |                              |             | cool       | rt | heat |                           |
| 6.56 mg | methanol : DCE = 4.0 : 6.0   | 130 $\mu$ L | S          | S  | S    |                           |
| 4.96 mg | methanol : DCE = 3.5 : 6.5   | 100 $\mu$ L | S          | S  | S    |                           |
| 4.53 mg | methanol : DCE = 3.3 : 6.7   | 90 $\mu$ L  | S          | S  | I    | LCST                      |
| 5.16 mg | methanol : DCE = 3.2 : 6.8   | 105 $\mu$ L | S          | S  | I    | LCST                      |
| 4.83 mg | methanol : DCE = 3.0 : 7.0   | 95 $\mu$ L  | I          | I  | I    |                           |
| 5.24 mg | methanol : DCE = 2.0 : 8.0   | 105 $\mu$ L | I          | I  | I    |                           |
| 5.06 mg | ethanol : DCE = 4.0 : 6.0    | 100 $\mu$ L | S          | S  | S    |                           |
| 5.56 mg | ethanol : DCE = 3.0 : 7.0    | 110 $\mu$ L | S          | S  | S    |                           |
| 6.91 mg | ethanol : DCE = 2.9 : 7.1    | 140 $\mu$ L | S          | S  | S    |                           |
| 5.91 mg | ethanol : DCE = 2.8 : 7.2    | 120 $\mu$ L | S          | S  | I    | LCST                      |
| 6.33 mg | ethanol : DCE = 2.7 : 7.3    | 125 $\mu$ L | I          | I  | I    |                           |
| 4.68 mg | ethanol : DCE = 2.5 : 7.5    | 95 $\mu$ L  | I          | I  | I    |                           |
| 5.94 mg | ethanol : DCE = 2.0 : 8.0    | 120 $\mu$ L | I          | I  | I    |                           |
| 4.84 mg | 1-propanol : DCE = 4.0 : 6.0 | 95 $\mu$ L  | S          | S  | S    |                           |
| 4.69 mg | 1-propanol : DCE = 3.0 : 7.0 | 95 $\mu$ L  | S          | S  | S    |                           |
| 5.85 mg | 1-propanol : DCE = 2.5 : 7.5 | 115 $\mu$ L | S          | S  | S    |                           |
| 6.61 mg | 1-propanol : DCE = 2.4 : 7.6 | 130 $\mu$ L | S          | S  | I    | LCST                      |
| 5.09 mg | 1-propanol : DCE = 2.3 : 7.7 | 100 $\mu$ L | I          | I  | I    |                           |
| 4.98 mg | 1-propanol : DCE = 2.0 : 8.0 | 100 $\mu$ L | I          | I  | I    |                           |
| 4.88 mg | 1-butanol : DCE = 3.0 : 7.0  | 95 $\mu$ L  | S          | S  | S    |                           |
| 4.75 mg | 1-butanol : DCE = 2.5 : 7.5  | 95 $\mu$ L  | S          | S  | S    |                           |
| 5.55 mg | 1-butanol : DCE = 2.3 : 7.7  | 110 $\mu$ L | S          | S  | S    |                           |
| 5.40 mg | 1-butanol : DCE = 2.2 : 7.8  | 110 $\mu$ L | S          | S  | I    | LCST                      |
| 6.53 mg | 1-butanol : DCE = 2.1 : 7.9  | 130 $\mu$ L | I          | I  | I    |                           |
| 4.67 mg | 1-butanol : DCE = 2.0 : 8.0  | 95 $\mu$ L  | I          | I  | I    |                           |
| 5.09 mg | 1-butanol : DCE = 1.0 : 9.0  | 100 $\mu$ L | I          | I  | I    |                           |
| 4.98 mg | 1-hexanol : DCE = 3.0 : 7.0  | 100 $\mu$ L | S          | S  | S    |                           |
| 7.14 mg | 1-hexanol : DCE = 2.0 : 8.0  | 145 $\mu$ L | S          | S  | I    | LCST                      |

**Table S21.** Composition of solution.

| polymer  | solvent (mol. ratio)         | concentration            |
|----------|------------------------------|--------------------------|
| 159.6 mg | 1-propanol : DCE = 2.4 : 7.6 | 3290 $\mu$ L<br>49 mg/mL |

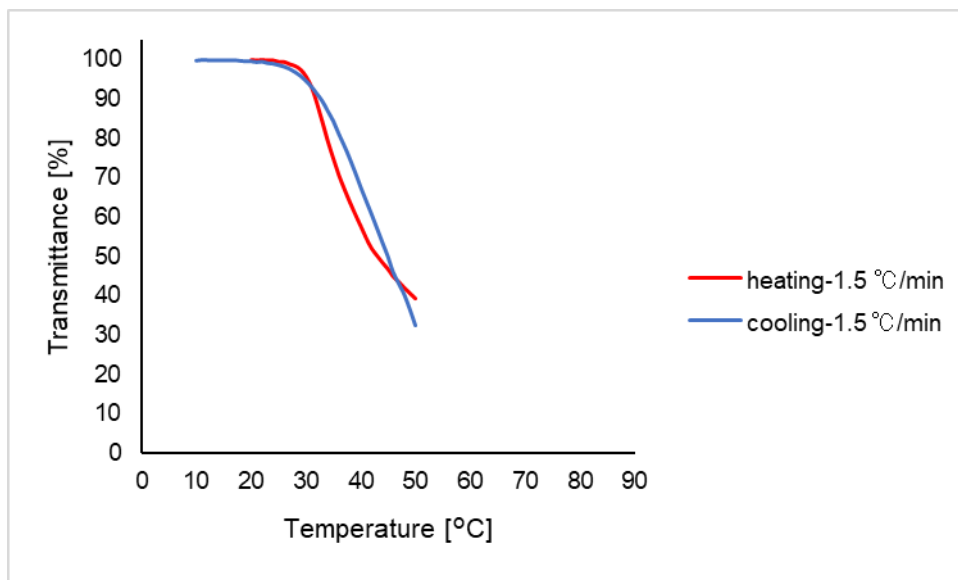

**Figure S20.** Transmittance change of P4A in 1-propanol and DCE at 800 nm.

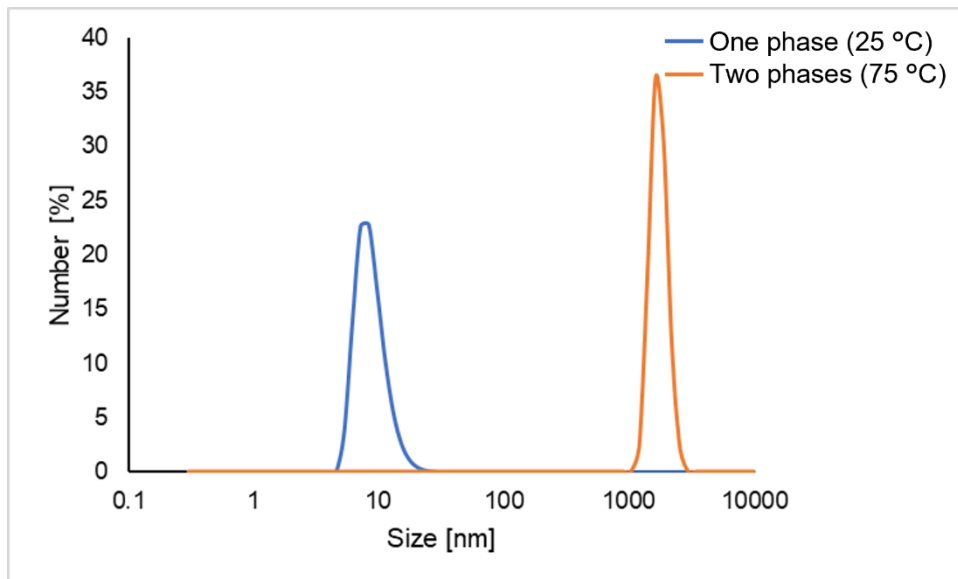

**Figure S21.** Size distribution by number of P4A in 1-propanol and DCE.

## 8. Thermal properties of poly(hydroxyalkyl (meth)acrylate)s analyzed by DSC

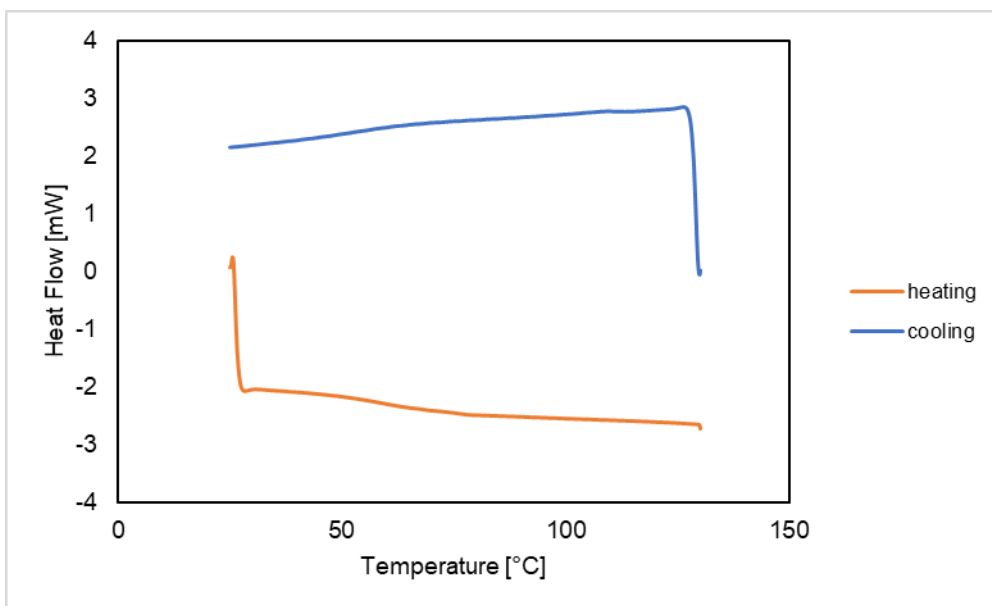

Figure S22. DSC thermographs of P3MA ( $T_g = 70$  °C).

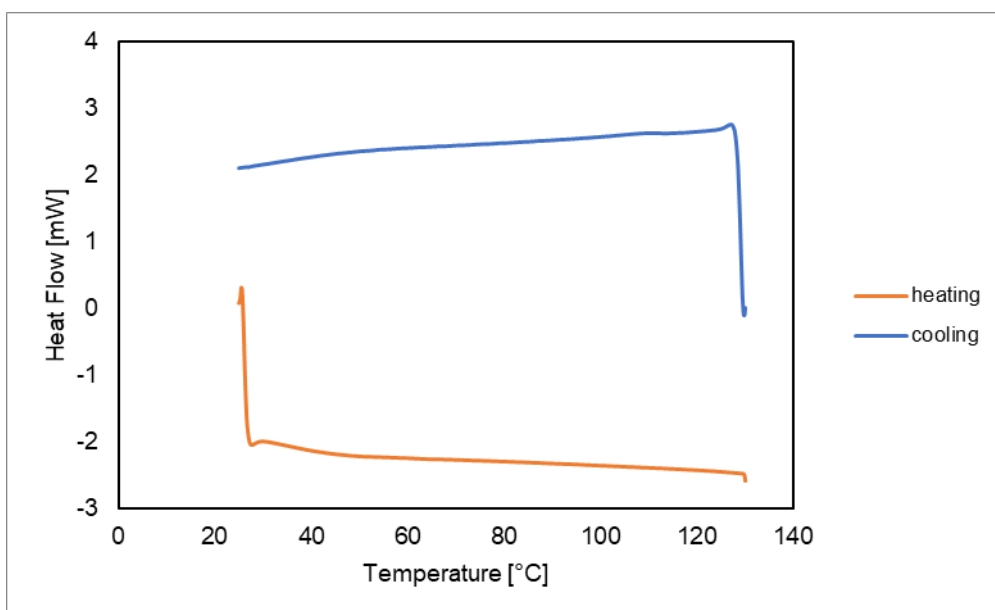

Figure S23. DSC thermographs of P4MA ( $T_g = 49$  °C).

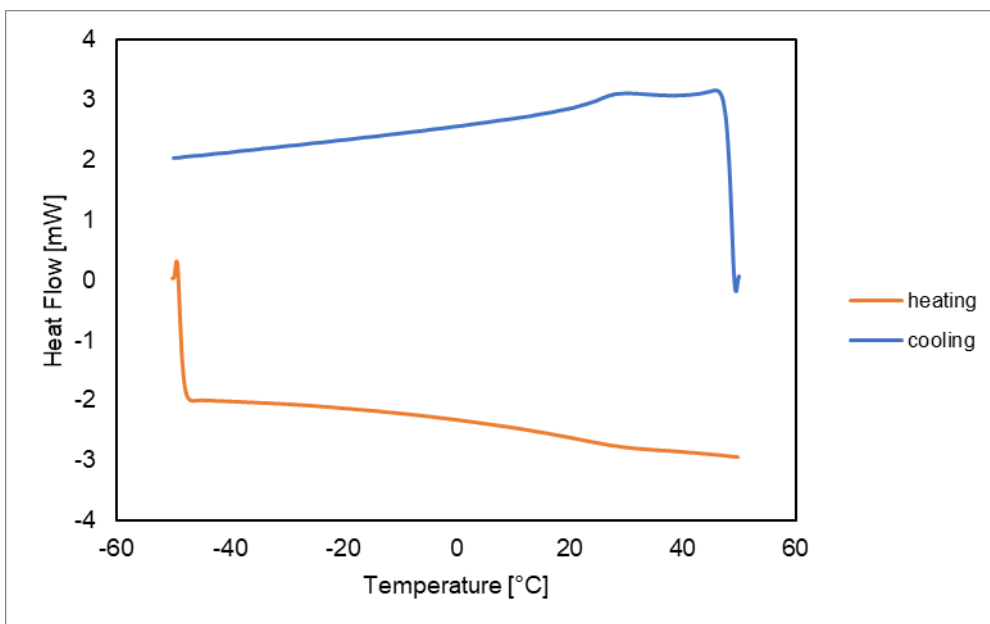

**Figure S24.** DSC thermographs of **P5MA** ( $T_g = 33$  °C).

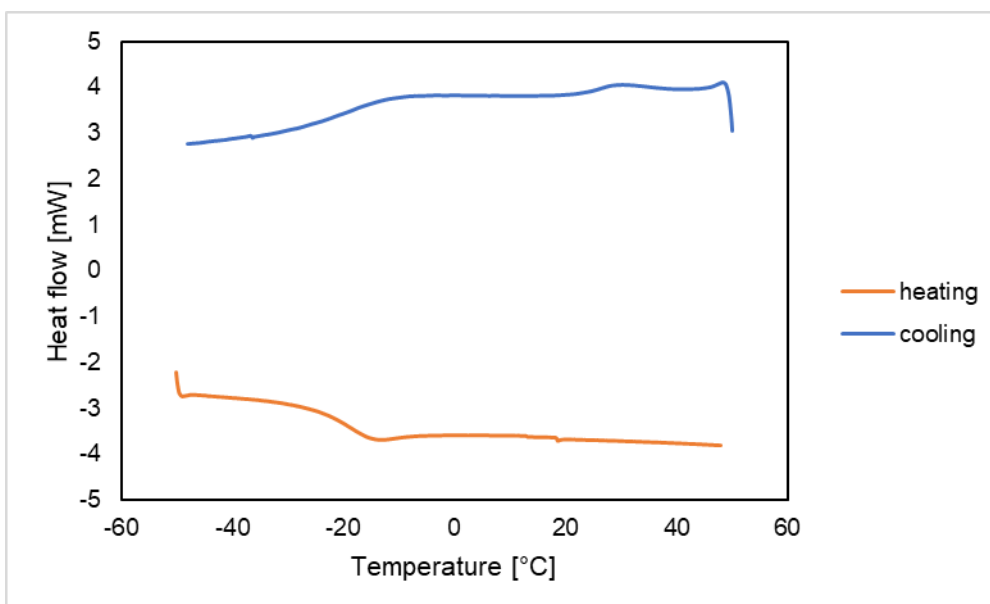

**Figure S25.** DSC thermographs of **P3A** ( $T_g = -11$  °C).

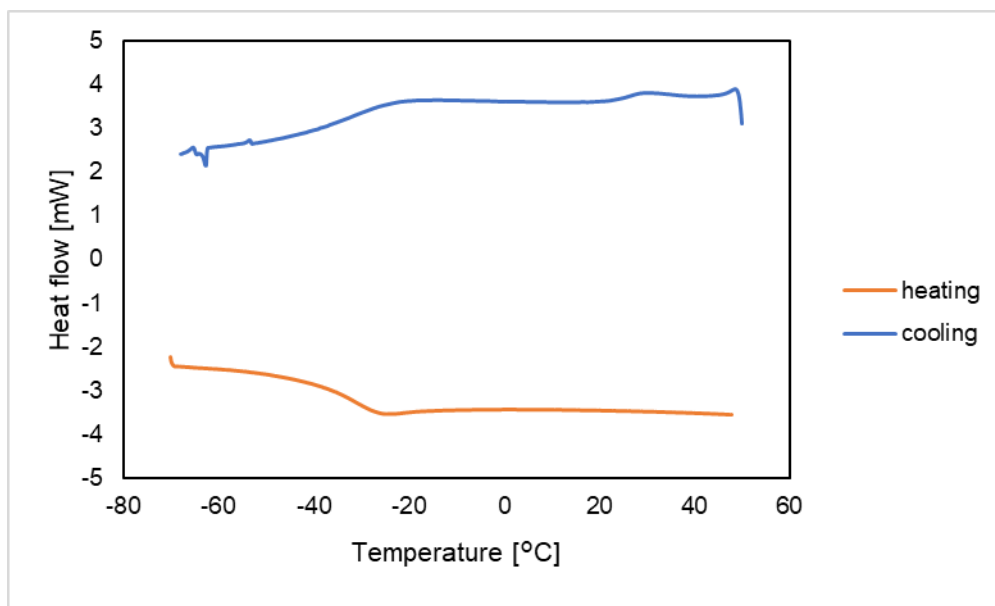

**Figure S26.** DSC thermographs of **P4A** ( $T_g = -23$  °C).

## 9. Supplementary references

- (1) D. Popescu, R. Hoogenboom, H. Keul and M. Moeller, *J. Mol. Catal. B-Enzym.*, 2010, **62**, 80.
- (2) T. Kato, S. Akebi, H. Nagae, K. Yonehara, T. Oku and K. Mashima, *Catal. Sci. Technol.* 2021, **11**, 6975.
